# Supplementary material
Source: Research Square preprint supplement (doi:10.21203/rs.3.rs-9106478/v1)
Supplement: Supplementary file 1 [file 47ec22db7ebdbc76dcb60c0f.xlsx]

## Sheet: metal vs solution PDLW1
sample		²⁰⁶Pb/²⁰⁴Pb	SE_²⁰⁶Pb/²⁰⁴Pb	²⁰⁷Pb/²⁰⁴Pb	SE_²⁰⁷Pb/²⁰⁴Pb	²⁰⁸Pb/²⁰⁴Pb	SE_²⁰⁸Pb/²⁰⁴Pb	²⁰⁸Pb/²⁰⁶Pb	SE_²⁰⁸Pb/²⁰⁶Pb	²⁰⁷Pb/²⁰⁶Pb	SE_²⁰⁷Pb/²⁰⁶Pb
PDLW1-metal		18.023	0.00063143	15.613	0.000618989	38.1495	0.0017339	2.11668	3.77585e-05	0.866286	1.06125e-05
PDLW1-metal		18.0239	0.000576148	15.614	0.00053965	38.1523	0.00143368	2.11674	2.93071e-05	0.866299	8.78339e-06
PDLW1-metal		18.0208	0.000418192	15.6117	0.000406581	38.1452	0.00104637	2.1167	2.36258e-05	0.866314	6.95425e-06
PDLW1-metal		18.0217	0.00042604	15.612	0.000396069	38.1461	0.00104032	2.11665	2.02855e-05	0.866288	6.56123e-06
PDLW1-metal		18.0222	0.000430308	15.6128	0.000401218	38.1483	0.00110535	2.11671	2.27425e-05	0.866313	6.50496e-06
PDLW1-metal		18.0218	0.000411629	15.6122	0.000376299	38.1466	0.000984038	2.11667	1.9806e-05	0.866299	6.26417e-06
PDLW1-metal		18.0215	0.000420674	15.612	0.000386264	38.1459	0.00105516	2.11667	1.97834e-05	0.866299	5.379e-06
PDLW1-metal		18.0211	0.000430206	15.6116	0.000402924	38.1449	0.00107857	2.11665	2.1186e-05	0.866296	6.91442e-06
PDLW1-pigment		18.0225	0.000682407	15.6124	0.000671831	38.1481	0.00175211	2.11667	3.57913e-05	0.866274	1.24318e-05
PDLW1-pigment		18.0229	0.000668759	15.6131	0.000644685	38.1494	0.00167971	2.11669	3.55864e-05	0.866291	1.28093e-05
PDLW1-pigment		18.0234	0.000629645	15.6137	0.000629056	38.152	0.00168523	2.11677	3.59673e-05	0.866301	1.11251e-05
PDLW1-pigment		18.0236	0.000647782	15.6141	0.000603726	38.152	0.00159409	2.11676	3.92938e-05	0.866318	1.31436e-05
PDLW1-pigment		18.0227	0.000681823	15.6127	0.000646765	38.149	0.00174334	2.1167	4.00145e-05	0.866283	1.26706e-05
PDLW1-pigment		18.0221	0.000674201	15.6119	0.000655315	38.1464	0.00182022	2.11662	4.54567e-05	0.866267	1.28839e-05
PDLW1-pigment		18.0219	0.000651701	15.6119	0.000659103	38.1465	0.00175389	2.11665	3.90523e-05	0.866277	1.15693e-05
PDLW1-pigment		18.0232	0.000639124	15.6131	0.000599616	38.1503	0.00169213	2.1167	3.79434e-05	0.866277	1.20875e-05
PDLW1-pigment		18.0222	0.000392821	15.613	0.000348331	38.1496	0.000914994	2.11678	1.86284e-05	0.866322	5.3452e-06
PDLW1-pigment		18.0227	0.000318629	15.6135	0.000312187	38.1512	0.000900507	2.11681	2.04253e-05	0.866329	5.64183e-06
PDLW1-pigment		18.0222	0.000353179	15.613	0.000353013	38.1497	0.000949957	2.11679	2.17517e-05	0.866323	6.69259e-06
PDLW1-pigment		18.0215	0.314312	15.6123	0.268552	38.1474	0.667217	2.11675	0.00222406	0.86632	0.0013616
PDLW1-pigment		18.0221	0.000625166	15.6121	0.000625663	38.147	0.00177334	2.11665	4.23129e-05	0.866278	1.28668e-05
PDLW1-pigment		18.0223	0.000570529	15.6124	0.000511397	38.1479	0.00143338	2.11668	3.53865e-05	0.866284	1.00507e-05
PDLW1-pigment		18.0228	0.000603943	15.613	0.00060141	38.1506	0.00168703	2.11677	3.97353e-05	0.866296	1.03244e-05
PDLW1-pigment		18.0221	0.000720332	15.6123	0.000702082	38.1474	0.00184737	2.11668	4.35018e-05	0.86629	1.33309e-05
PDLW1-pigment		18.0219	0.000626788	15.612	0.000605262	38.1461	0.00164103	2.11662	3.92621e-05	0.866281	1.21088e-05
PDLW1-pigment		18.0225	0.000640741	15.613	0.000634612	38.1491	0.00171649	2.11672	3.97002e-05	0.866307	1.13529e-05
PDLW1-pigment		18.0228	0.000565744	15.6132	0.00054445	38.1511	0.00157721	2.1168	3.52311e-05	0.866304	1.09035e-05
PDLW1-pigment		18.0226	0.000358165	15.6136	0.000340896	38.1516	0.000902277	2.11685	2.15257e-05	0.866336	6.16798e-06
PDLW1-pigment		18.0235	0.000417404	15.6143	0.000418093	38.1532	0.00111836	2.11683	2.13049e-05	0.866333	6.36258e-06
PDLW1-pigment		18.0217	0.000780058	15.6128	0.000741033	38.1487	0.00198655	2.11679	4.54278e-05	0.866337	1.40264e-05
PDLW1-pigment		18.0214	0.000802369	15.6115	0.000795349	38.1446	0.002067	2.1166	4.18381e-05	0.866274	1.37683e-05
PDLW1-pigment		18.0221	0.000637412	15.6122	0.000611206	38.1469	0.00166403	2.11665	4.11369e-05	0.866286	1.08343e-05
PDLW1-pigment		18.0223	0.000721238	15.6126	0.00066708	38.1486	0.00184365	2.11671	3.78919e-05	0.866294	1.0964e-05
PDLW1-pigment		18.0223	0.000590572	15.6125	0.000578066	38.1478	0.00164464	2.11667	4.11596e-05	0.866287	1.29123e-05
PDLW1-pigment		18.0222	0.000598089	15.6123	0.00053931	38.1473	0.00146446	2.11666	3.56844e-05	0.866286	1.13162e-05
PDLW1-pigment		18.0234	0.000676076	15.6139	0.000666022	38.1526	0.00186401	2.11681	4.1896e-05	0.866317	1.1149e-05
PDLW1-pigment		18.0222	0.00063076	15.6123	0.000634051	38.1476	0.00169955	2.11667	3.85301e-05	0.866285	1.30261e-05
PDLW1-pigment		18.0222	0.000694174	15.6123	0.000660959	38.1478	0.0017724	2.11668	3.53055e-05	0.866283	1.13808e-05
PDLW1-pigment		18.0234	0.000618062	15.6138	0.00061334	38.1519	0.0016685	2.11678	3.62054e-05	0.866309	1.11877e-05
PDLW1-pigment		18.0205	0.000752136	15.6117	0.000738618	38.1457	0.00199306	2.11677	4.67695e-05	0.866332	1.39788e-05
PDLW1-pigment		18.0222	0.000713071	15.6123	0.000703539	38.1466	0.00191176	2.11661	4.11904e-05	0.866281	1.29597e-05
PDLW1-pigment		18.0223	0.000619058	15.6126	0.000615902	38.1473	0.00169485	2.11665	4.19367e-05	0.866295	1.28474e-05
PDLW1-pigment		18.0227	0.000619145	15.6127	0.000601283	38.1482	0.0016319	2.11665	3.82015e-05	0.866283	1.13287e-05
PDLW1-pigment		18.0218	0.000720407	15.6115	0.000727625	38.1444	0.00198592	2.11655	4.25948e-05	0.866261	1.26529e-05
PDLW1-pigment		18.0225	0.000667669	15.6128	0.000627709	38.1482	0.00171685	2.11668	4.03389e-05	0.866296	1.25531e-05
PDLW1-pigment		18.0221	0.000698225	15.6121	0.000707705	38.1467	0.00195084	2.11663	4.13925e-05	0.866275	1.17998e-05
PDLW1-pigment		18.0225	0.000570609	15.6128	0.000513756	38.1488	0.00145739	2.1167	3.59391e-05	0.866294	1.1064e-05
PDLW1-pigment		18.0224	0.000709152	15.6129	0.000689347	38.1488	0.00183848	2.11672	4.43906e-05	0.866306	1.40231e-05

## Sheet: metal vs solution PDLW2
sample		²⁰⁶Pb/²⁰⁴Pb	SE_²⁰⁶Pb/²⁰⁴Pb	²⁰⁷Pb/²⁰⁴Pb	SE_²⁰⁷Pb/²⁰⁴Pb	²⁰⁸Pb/²⁰⁴Pb	SE_²⁰⁸Pb/²⁰⁴Pb	²⁰⁸Pb/²⁰⁶Pb	SE_²⁰⁸Pb/²⁰⁶Pb	²⁰⁷Pb/²⁰⁶Pb	SE_²⁰⁷Pb/²⁰⁶Pb
PDLW2-metal		18.0448	0.000552248	15.6169	0.000520966	38.1762	0.00131054	2.11561	3.18912e-05	0.865454	9.93207e-06
PDLW2-metal		18.0465	0.000654539	15.6185	0.000606042	38.1799	0.00167758	2.11561	3.48918e-05	0.865459	9.88353e-06
PDLW2-metal		18.0439	0.000416002	15.616	0.000393394	38.1722	0.00109801	2.11549	2.16835e-05	0.865445	6.1824e-06
PDLW2-metal		18.0437	0.000418875	15.616	0.000412596	38.1723	0.00102593	2.11552	1.93594e-05	0.865452	6.83092e-06
PDLW2-metal		18.0442	0.000278155	15.6164	0.00025195	38.1736	0.000698393	2.11554	1.70209e-05	0.865457	5.50852e-06
PDLW2-metal		18.043	0.000384855	15.6154	0.000367344	38.1711	0.00101971	2.11554	2.08786e-05	0.865454	5.84835e-06
PDLW2-metal		18.0442	0.000363109	15.6167	0.000335995	38.1742	0.000901276	2.11557	2.02454e-05	0.865473	5.60522e-06
PDLW2-metal		18.0436	0.000333431	15.6158	0.000343647	38.1718	0.000940337	2.1155	2.25663e-05	0.86545	6.62057e-06
PDLW2-pigment		18.0447	0.000737927	15.6164	0.00071298	38.1739	0.00199782	2.11548	4.22676e-05	0.865428	1.28516e-05
PDLW2-pigment		18.0438	0.000647564	15.6153	0.000689448	38.1708	0.00182657	2.11542	4.16227e-05	0.865412	1.32823e-05
PDLW2-pigment		18.0439	0.000638882	15.6157	0.000607392	38.1728	0.00168855	2.11553	4.09964e-05	0.865434	1.06334e-05
PDLW2-pigment		18.0443	0.000608113	15.6162	0.000595964	38.1737	0.00158691	2.11552	3.69591e-05	0.865434	1.12039e-05
PDLW2-pigment		18.0441	0.000871764	15.6163	0.000797408	38.174	0.00215535	2.11556	4.79893e-05	0.865453	1.38278e-05
PDLW2-pigment		18.0447	0.000375235	15.6172	0.00036688	38.1765	0.000988196	2.11563	2.18521e-05	0.86547	6.57278e-06
PDLW2-pigment		18.0452	0.000737707	15.6168	0.000693331	38.175	0.00184695	2.1155	3.85295e-05	0.865433	1.24598e-05
PDLW2-pigment		18.045	0.000697022	15.6165	0.000660981	38.1743	0.00175881	2.11547	3.89769e-05	0.86542	1.1547e-05
PDLW2-pigment		18.0452	0.000681783	15.6168	0.000652312	38.1761	0.00188329	2.11556	4.15224e-05	0.865431	1.23607e-05
PDLW2-pigment		18.0458	0.000720211	15.6181	0.000718557	38.1779	0.00193248	2.11559	4.40078e-05	0.86547	1.40302e-05
PDLW2-pigment		18.0441	0.000663597	15.6159	0.000642655	38.1727	0.00189263	2.1155	4.52648e-05	0.865431	1.23978e-05
PDLW2-pigment		18.0447	0.000782663	15.6163	0.000770323	38.1737	0.00215469	2.11547	4.43093e-05	0.865423	1.30929e-05
PDLW2-pigment		18.0442	0.000602745	15.6162	0.000573566	38.173	0.00150727	2.1155	3.72829e-05	0.865443	1.246e-05
PDLW2-pigment		18.045	0.000615942	15.6165	0.000570429	38.1747	0.00153401	2.1155	3.43391e-05	0.865422	9.95867e-06
PDLW2-pigment		18.0447	0.000346375	15.6172	0.000366631	38.1763	0.00104416	2.11563	2.47422e-05	0.865472	6.73323e-06
PDLW2-pigment		18.045	0.000322907	15.6175	0.000313583	38.1774	0.000857332	2.11565	1.78307e-05	0.865481	5.17718e-06
PDLW2-pigment		18.0447	0.000325757	15.6174	0.000328084	38.1766	0.000907497	2.11564	2.11849e-05	0.865482	6.76759e-06
PDLW2-pigment		18.044	0.00071371	15.6162	0.000644902	38.1734	0.00174566	2.11554	4.03272e-05	0.865452	1.36737e-05
PDLW2-pigment		18.0445	0.000660344	15.616	0.000646552	38.1727	0.00175398	2.11545	3.91354e-05	0.865415	1.22132e-05
PDLW2-pigment		18.044	0.000683431	15.6159	0.000640418	38.1728	0.00168386	2.1155	3.52942e-05	0.865431	1.13821e-05
PDLW2-pigment		18.0449	0.000610396	15.6167	0.000607401	38.1757	0.00164514	2.11557	3.67733e-05	0.865437	1.12121e-05
PDLW2-pigment		18.044	0.000786695	15.6156	0.000790335	38.1717	0.00216127	2.11545	4.97689e-05	0.865417	1.52126e-05
PDLW2-pigment		18.0431	0.000698524	15.6145	0.000658869	38.1691	0.00181291	2.11541	4.17655e-05	0.865403	1.29127e-05
PDLW2-pigment		18.0449	0.000602856	15.6168	0.000614527	38.1748	0.00172527	2.11551	4.25197e-05	0.865442	1.17808e-05
PDLW2-pigment		18.0457	0.000707926	15.6175	0.000693866	38.1781	0.00185105	2.1156	3.77626e-05	0.865441	1.14537e-05
PDLW2-pigment		18.0444	0.000354619	15.6169	0.00035625	38.1754	0.000973081	2.11561	2.20886e-05	0.865473	6.56855e-06
PDLW2-pigment		18.0452	0.000833915	15.6173	0.000815708	38.176	0.00221049	2.11555	5.13827e-05	0.865458	1.4976e-05
PDLW2-pigment		18.0434	0.000742616	15.6151	0.000735739	38.1706	0.00214827	2.11546	4.90249e-05	0.86542	1.36558e-05
PDLW2-pigment		18.0438	0.000686536	15.6158	0.00064657	38.1723	0.00175159	2.11551	3.90783e-05	0.865443	1.29752e-05
PDLW2-pigment		18.0448	0.000628291	15.6164	0.000608367	38.1747	0.00163775	2.11553	3.6755e-05	0.865429	1.13365e-05
PDLW2-pigment		18.0456	0.00071399	15.6169	0.00067773	38.1759	0.00182091	2.11549	3.87479e-05	0.865415	1.21814e-05
PDLW2-pigment		18.0443	0.00070497	15.616	0.000669081	38.1728	0.0018024	2.11548	3.96043e-05	0.865426	1.18633e-05
PDLW2-pigment		18.0443	0.000690391	15.6162	0.000635976	38.174	0.00181113	2.11554	3.69083e-05	0.86544	1.16904e-05
PDLW2-pigment		18.0449	0.000820274	15.6175	0.000785273	38.1768	0.00223606	2.11563	5.08299e-05	0.865481	1.28008e-05
PDLW2-pigment		18.044	0.000649589	15.6153	0.00065728	38.1702	0.0018831	2.11537	4.56139e-05	0.865405	1.32603e-05
PDLW2-pigment		18.0439	0.000738658	15.6155	0.000711066	38.1719	0.00191388	2.11547	3.97223e-05	0.865415	1.17232e-05
PDLW2-pigment		18.0445	0.000635556	15.6165	0.000611178	38.1749	0.0017646	2.11557	3.90428e-05	0.865444	1.07211e-05
PDLW2-pigment		18.0446	0.000693026	15.6164	0.000671441	38.1739	0.00179912	2.1155	3.95187e-05	0.865437	1.20828e-05
PDLW2-pigment		18.045	0.000684021	15.6166	0.000648071	38.1746	0.00170671	2.1155	3.569e-05	0.865428	1.11043e-05
PDLW2-pigment		18.0457	0.000651131	15.6174	0.000641688	38.1773	0.00170168	2.11556	3.63118e-05	0.86544	1.16331e-05

## Sheet: GN
sample		²⁰⁶Pb/²⁰⁴Pb	SE_²⁰⁶Pb/²⁰⁴Pb	²⁰⁷Pb/²⁰⁴Pb	SE_²⁰⁷Pb/²⁰⁴Pb	²⁰⁸Pb/²⁰⁴Pb	SE_²⁰⁸Pb/²⁰⁴Pb	²⁰⁸Pb/²⁰⁶Pb	SE_²⁰⁸Pb/²⁰⁶Pb	²⁰⁷Pb/²⁰⁶Pb	SE_²⁰⁷Pb/²⁰⁶Pb
GN D'Imporzano et al. 2021		18.3811	0.000329861	15.6781	0.000525432	38.5459	0.000831539	2.09702	1.95377e-05	0.852951	2.16744e-05
GN D'Imporzano et al. 2021		18.3796	0.00031009	15.6764	0.000516215	38.5412	0.000745923	2.09693	1.49047e-05	0.852925	2.23089e-05
GN D'Imporzano et al. 2021		18.3795	0.000305342	15.6765	0.000520555	38.5415	0.000711524	2.09695	1.43534e-05	0.852935	2.22105e-05
GN D'Imporzano et al. 2021		18.3793	0.000294751	15.676	0.000545642	38.5399	0.000698301	2.09689	1.49857e-05	0.852919	2.38583e-05
GN D'Imporzano et al. 2021		18.3787	0.000347867	15.6747	0.000567	38.5338	0.000904377	2.09662	1.95168e-05	0.852875	2.29802e-05
GN D'Imporzano et al. 2021		18.3768	0.000310952	15.673	0.000530582	38.5297	0.000813818	2.09662	1.89318e-05	0.852868	2.28865e-05
GN D'Imporzano et al. 2021		18.3778	0.000276977	15.6745	0.000518516	38.5354	0.000644999	2.09681	1.39424e-05	0.852904	2.30919e-05
GN D'Imporzano et al. 2021		18.3793	0.000309695	15.6755	0.000624288	38.5384	0.000722123	2.09681	1.3297e-05	0.852893	2.73187e-05
GN D'Imporzano et al. 2021		18.3801	0.000372925	15.6767	0.000587008	38.5426	0.00103564	2.09695	2.2257e-05	0.85292	2.26659e-05
GN D'Imporzano et al. 2021		18.3806	0.000375583	15.6777	0.00062239	38.5448	0.00102309	2.09701	2.26983e-05	0.852947	2.47511e-05
GN D'Imporzano et al. 2021		18.378	0.000381364	15.6744	0.00074794	38.5339	0.000894912	2.09672	1.90789e-05	0.852893	3.12522e-05
GN D'Imporzano et al. 2021		18.3807	0.000359375	15.6773	0.000620108	38.5439	0.000859511	2.09695	1.70536e-05	0.852925	2.51252e-05
GN D'Imporzano et al. 2021		18.382	0.000438657	15.6779	0.000612672	38.5439	0.000977089	2.0968	1.60332e-05	0.852896	2.31216e-05
GN D'Imporzano et al. 2021		18.3801	0.000285803	15.6773	0.000511835	38.544	0.000664262	2.09702	1.4906e-05	0.85295	2.15707e-05
GN D'Imporzano et al. 2021		18.3783	0.000292335	15.6744	0.000565103	38.5346	0.000639907	2.09671	1.38839e-05	0.852875	2.42176e-05
GN D'Imporzano et al. 2021		18.3798	0.000303195	15.6766	0.000568706	38.5421	0.00069908	2.09696	1.45033e-05	0.85293	2.38539e-05
GN D'Imporzano et al. 2021		18.3784	0.000309076	15.6743	0.000541887	38.5342	0.000711022	2.09669	1.50107e-05	0.852867	2.3115e-05
GN D'Imporzano et al. 2021		18.3767	0.000351962	15.6733	0.000565812	38.5307	0.000791067	2.09668	1.36241e-05	0.85289	2.29975e-05
GN D'Imporzano et al. 2021		18.3782	0.00035451	15.6748	0.000669196	38.5352	0.000772743	2.09676	1.35526e-05	0.852903	2.85965e-05
GN D'Imporzano et al. 2021		18.3794	0.000334754	15.6767	0.000590504	38.5418	0.000768646	2.09698	1.34993e-05	0.852946	2.49136e-05
GN D'Imporzano et al. 2021		18.3791	0.00033302	15.6761	0.000601263	38.5394	0.000817432	2.09689	1.60838e-05	0.852937	2.49472e-05
GN D'Imporzano et al. 2021		18.3785	0.000296251	15.6755	0.000548601	38.5379	0.000686701	2.09688	1.39218e-05	0.852927	2.25894e-05
GN D'Imporzano et al. 2021		18.3796	0.000320429	15.6766	0.000590246	38.541	0.000712881	2.09692	1.30296e-05	0.852934	2.40822e-05
GN D'Imporzano et al. 2021		18.3777	0.000321699	15.6752	0.000569929	38.526	0.000740176	2.09656	1.41998e-05	0.852867	2.39581e-05
GN D'Imporzano et al. 2021		18.3783	0.000308912	15.6745	0.000532124	38.5353	0.000710449	2.09676	1.37033e-05	0.852886	2.22055e-05
GN D'Imporzano et al. 2021		18.376	0.000368442	15.6728	0.000542457	38.5296	0.000834661	2.0967	1.61163e-05	0.852893	2.05156e-05
GN D'Imporzano et al. 2021		18.377	0.000364174	15.6736	0.000557669	38.5317	0.000833937	2.09671	1.63473e-05	0.852896	2.12722e-05
GN D'Imporzano et al. 2021		18.3782	0.000382047	15.6741	0.000561126	38.5321	0.000935725	2.09659	1.81571e-05	0.852862	2.21055e-05
GN D'Imporzano et al. 2021		18.3777	0.000354261	15.6738	0.000558708	38.5312	0.000871613	2.0966	1.94885e-05	0.85287	2.27778e-05
GN D'Imporzano et al. 2021		18.3778	0.00035607	15.6737	0.000516189	38.5319	0.000846269	2.09663	1.78277e-05	0.852865	2.09335e-05
GN		18.3797	0.000515032	15.6772	0.00046983	38.5431	0.00129975	2.09702	2.45576e-05	0.852963	7.20234e-06
GN		18.38	0.000400487	15.6774	0.000383584	38.5437	0.000997844	2.09701	1.73814e-05	0.85296	5.61119e-06
GN		18.3794	0.000397391	15.677	0.000357827	38.5418	0.000956158	2.09698	1.93831e-05	0.85297	5.30709e-06
GN		18.3795	0.00050776	15.6769	0.00048726	38.5421	0.00133916	2.09699	2.18036e-05	0.852961	6.79221e-06
GN		18.3795	0.000371329	15.6769	0.000367798	38.5425	0.000995748	2.09701	2.40118e-05	0.852958	6.78758e-06
GN		18.3786	0.000816517	15.6751	0.000777584	38.5362	0.00205754	2.09677	3.81499e-05	0.852901	1.18702e-05
GN		18.3788	0.000716748	15.6753	0.000685503	38.5371	0.00188035	2.0968	4.00317e-05	0.852902	1.21301e-05
GN		18.3801	0.000722544	15.6769	0.000719821	38.5419	0.00194402	2.09691	3.95518e-05	0.852931	1.21368e-05
GN		18.3796	0.00060193	15.6763	0.000569031	38.5411	0.00158057	2.09692	3.61943e-05	0.852917	9.55787e-06
GN		18.378	0.000801925	15.6754	0.000779656	38.5375	0.00218116	2.0969	5.26586e-05	0.85294	1.62504e-05
GN		18.3781	0.000957573	15.6756	0.000855709	38.5382	0.0023502	2.09694	5.14564e-05	0.85295	1.25017e-05
GN		18.3772	0.000739702	15.6741	0.000707415	38.534	0.00193519	2.09682	4.11677e-05	0.852914	1.14623e-05
GN		18.3776	0.00081863	15.6743	0.000776225	38.5347	0.00205532	2.0968	4.0423e-05	0.852902	1.29311e-05
GN		18.3797	0.000748928	15.6765	0.000689172	38.5403	0.00187726	2.09687	3.8717e-05	0.852927	1.25784e-05
GN		18.3797	0.000670904	15.6765	0.000626057	38.5413	0.0017282	2.09692	3.53718e-05	0.852922	1.01347e-05
GN		18.3784	0.000768184	15.6759	0.000724828	38.5396	0.0020454	2.09698	4.96702e-05	0.852953	1.48925e-05
GN		18.3784	0.000770619	15.6746	0.000733518	38.5358	0.00207441	2.09678	4.10221e-05	0.852885	1.21075e-05
GN		18.3796	0.000706668	15.6764	0.000706056	38.5399	0.00185956	2.09686	4.06243e-05	0.852923	1.30416e-05
GN		18.379	0.000671455	15.6759	0.000663388	38.5386	0.00178467	2.09686	3.61591e-05	0.852925	1.13947e-05
GN		18.3789	0.000773571	15.6756	0.000708393	38.5391	0.00192237	2.09689	3.99568e-05	0.852915	1.11508e-05
GN		18.379	0.000834632	15.6768	0.000753387	38.5424	0.00207006	2.09706	4.67771e-05	0.852974	1.38416e-05
GN		18.3788	0.000694351	15.6753	0.000655449	38.5372	0.00180785	2.09681	4.37804e-05	0.852902	1.34169e-05
GN		18.3784	0.000712524	15.6756	0.000657211	38.5382	0.00185385	2.09691	3.72356e-05	0.852938	1.11414e-05
GN		18.3793	0.000665186	15.6762	0.000625963	38.5404	0.00167045	2.09692	3.66184e-05	0.852928	1.12921e-05
GN		18.3799	0.000841895	15.6773	0.000777553	38.5433	0.00217332	2.09701	4.49931e-05	0.852963	1.35471e-05
GN		18.3785	0.000641323	15.6751	0.000661079	38.5368	0.00188523	2.09681	4.67451e-05	0.852904	1.35511e-05
GN		18.3777	0.00065247	15.6748	0.000614106	38.5359	0.00169038	2.09686	3.902e-05	0.852925	1.20902e-05
GN		18.379	0.000601215	15.6759	0.000570632	38.5395	0.00152296	2.0969	3.77823e-05	0.852922	1.10603e-05
GN		18.379	0.000624399	15.6757	0.000599102	38.5387	0.00164112	2.09686	4.08885e-05	0.852913	1.28573e-05
GN		18.3795	0.000667823	15.6761	0.000643451	38.5404	0.00183644	2.09689	3.93697e-05	0.852911	1.06742e-05
GN		18.3813	0.000626927	15.6782	0.000589679	38.5463	0.00169351	2.09701	3.73716e-05	0.852942	1.14676e-05
GN		18.3792	0.000716212	15.6756	0.000679362	38.5386	0.00176064	2.09683	3.47206e-05	0.852901	1.18853e-05
GN		18.3789	0.000645268	15.6756	0.000626245	38.5386	0.00165938	2.09687	3.83742e-05	0.852916	1.36894e-05
GN		18.3802	0.000622953	15.6769	0.000617563	38.5425	0.00167598	2.09693	3.66695e-05	0.852925	1.14142e-05
GN		18.3791	0.000591684	15.6756	0.000580799	38.5388	0.00161682	2.09685	4.01382e-05	0.852903	1.25355e-05
GN		18.3791	0.000660586	15.6754	0.000634928	38.5373	0.00183251	2.09677	3.8768e-05	0.852892	1.05001e-05
GN		18.3811	0.000603547	15.678	0.000586795	38.5451	0.00163511	2.09697	3.68467e-05	0.852943	1.14292e-05
GN		18.3796	0.000694895	15.6762	0.0006567	38.5397	0.00174036	2.09684	3.71159e-05	0.85291	1.19463e-05
GN		18.3795	0.000594036	15.6759	0.000568038	38.5396	0.00154806	2.09686	3.92288e-05	0.852904	1.32909e-05
GN		18.3802	0.000623682	15.6771	0.00061833	38.5431	0.00171488	2.09697	3.90686e-05	0.852937	1.13666e-05
GN 10.2		18.3827	0.0032	15.6789	0.0025	38.5491	0.0053	2.09703	0.00025	0.852916	0.00013
GN 10.2		18.3803	0.0026	15.6763	0.0026	38.5395	0.0059	2.09678	0.00022	0.852886	0.00011
GN 10.2		18.3828	0.0023	15.6805	0.0021	38.5541	0.0048	2.09729	0.00023	0.852998	0.00011
GN 10.2		18.3766	0.0026	15.6737	0.0023	38.532	0.0053	2.0968	0.00023	0.852916	0.00012
GN 10.2		18.3814	0.0028	15.6777	0.0026	38.5451	0.0061	2.09696	0.00024	0.852911	0.00012
GN 10.2		18.3799	0.0025	15.6753	0.0026	38.5389	0.0059	2.0968	0.00025	0.85285	0.00012
GN 10.2		18.3815	0.0024	15.6775	0.0027	38.5433	0.0057	2.09685	0.00021	0.852896	0.00011
GN 10.2		18.3818	0.0027	15.6794	0.0023	38.5495	0.0053	2.09716	0.00026	0.852985	0.00013
GN 10.2		18.383	0.0039	15.6784	0.003	38.544	0.0072	2.09672	0.00031	0.852875	0.00016
GN 10.2		18.3826	0.0036	15.6794	0.003	38.55	0.007	2.09709	0.00024	0.852948	0.00012
GN 10.2		18.3799	0.0037	15.6768	0.0035	38.5448	0.0084	2.09712	0.00025	0.852932	0.00013
GN 10.2		18.3821	0.0034	15.6785	0.0032	38.5455	0.0072	2.0969	0.00031	0.852922	0.00016
GN 10.2		18.3842	0.0038	15.6823	0.0031	38.5613	0.007	2.09752	0.00021	0.853031	0.0001
GN 10.2		18.3874	0.003	15.686	0.0033	38.5695	0.0072	2.0976	0.00024	0.853084	0.00012
GN 10.2		18.3872	0.0039	15.6858	0.0035	38.5696	0.0083	2.09763	0.00024	0.853083	0.00012
GN 10.2		18.3844	0.0041	15.6817	0.0037	38.5577	0.0086	2.09731	0.00022	0.852989	0.00011
GN 10.2		18.3778	0.0032	15.6728	0.0028	38.5331	0.0067	2.09672	0.00022	0.852812	0.00011
GN 10.2		18.3816	0.0033	15.677	0.0027	38.5426	0.0064	2.0968	0.00017	0.852864	9.2e-05
GN 10.2		18.3816	0.0029	15.6773	0.0026	38.5432	0.0062	2.09684	0.00018	0.85288	9.4e-05
GN 10.2		18.3803	0.0029	15.6773	0.0022	38.5405	0.0053	2.09684	0.00022	0.85294	0.00011
GN 14.7		18.3767	0.0026	15.6739	0.0022	38.5356	0.0051	2.09698	0.0001	0.852922	4e-05
GN 14.7		18.3772	0.0026	15.6741	0.0022	38.5364	0.0055	2.09697	0.00011	0.85291	5.3e-05
GN 14.7		18.3795	0.0023	15.6764	0.002	38.5407	0.0047	2.09694	0.00011	0.852929	5.8e-05
GN 14.7		18.3791	0.0021	15.6761	0.0021	38.5399	0.0046	2.09694	0.00011	0.852931	5.7e-05
GN 14.7		18.3822	0.0025	15.6781	0.0019	38.5453	0.0049	2.09688	0.00012	0.852896	5.9e-05
GN 14.7		18.3822	0.0024	15.6794	0.0021	38.5476	0.0047	2.09701	0.00014	0.852966	7.2e-05
GN 14.7		18.3822	0.002	15.6782	0.002	38.547	0.0046	2.09697	0.00011	0.852901	6e-05
GN 14.7		18.3787	0.0025	15.6761	0.0019	38.5396	0.0048	2.09697	0.00014	0.852949	7.2e-05
GN 14.7		18.3787	0.0037	15.6785	0.0031	38.5485	0.0079	2.09746	0.00019	0.85308	9.2e-05
GN 14.7		18.3805	0.0033	15.6788	0.0027	38.5469	0.0064	2.09716	0.00016	0.853013	8.2e-05
GN 14.7		18.3859	0.0032	15.6821	0.0027	38.5582	0.0066	2.09716	0.00016	0.852942	8e-05
GN 14.7		18.3801	0.0031	15.6763	0.0028	38.5408	0.0065	2.09688	0.00017	0.852895	8.6e-05
GN 14.7		18.3817	0.0028	15.6787	0.0025	38.5467	0.0058	2.09701	0.00018	0.852952	9.2e-05
GN 14.7		18.3859	0.0029	15.6813	0.0024	38.5548	0.0057	2.09698	0.00019	0.852898	9.9e-05
GN 14.7		18.3796	0.0029	15.6778	0.0025	38.5462	0.0058	2.09723	0.00018	0.853	8.8e-05
GN 14.7		18.3803	0.003	15.6779	0.0027	38.5431	0.0062	2.09698	0.00019	0.852973	9.5e-05
GN 14.7		18.3823	0.0028	15.6786	0.0025	38.5485	0.0059	2.09704	0.00014	0.852918	6.8e-05
GN 14.7		18.3802	0.0025	15.6776	0.0024	38.5465	0.0054	2.09718	0.00014	0.852961	7.1e-05
GN 14.7		18.3822	0.0032	15.6795	0.0029	38.5523	0.007	2.09726	0.00015	0.852972	7.2e-05
GN 14.7		18.3827	0.003	15.6805	0.0028	38.5548	0.007	2.09734	0.00015	0.853003	6.6e-05
GN 14.7		18.3829	0.0028	15.681	0.0024	38.5579	0.0059	2.09749	0.00014	0.853021	6.1e-05
GN 14.7		18.3853	0.0029	15.6827	0.0024	38.5616	0.0058	2.09741	0.00012	0.853002	5.7e-05
GN 14.7		18.383	0.0025	15.6804	0.0023	38.5535	0.0054	2.09724	0.00011	0.852984	5.7e-05
GN 14.7		18.3799	0.0028	15.6763	0.0024	38.5405	0.0057	2.09688	0.00014	0.852905	6.8e-05
GN 14.7		18.3792	0.0028	15.6756	0.0027	38.539	0.0063	2.09688	0.00012	0.852899	6.1e-05
GN 14.7		18.376	0.0028	15.6723	0.0025	38.5304	0.006	2.09678	0.00012	0.852868	5.9e-05
GN 14.7		18.3806	0.0025	15.6767	0.0021	38.5421	0.0052	2.09689	0.00011	0.852894	6e-05
GN 14.7		18.3783	0.0022	15.6742	0.0017	38.5381	0.0041	2.09693	0.00013	0.852865	6.1e-05

## Sheet: Solution PDLW2 and LA
sample		²⁰⁶Pb/²⁰⁴Pb	SE_²⁰⁶Pb/²⁰⁴Pb	²⁰⁷Pb/²⁰⁴Pb	SE_²⁰⁷Pb/²⁰⁴Pb	²⁰⁸Pb/²⁰⁴Pb	SE_²⁰⁸Pb/²⁰⁴Pb	²⁰⁸Pb/²⁰⁶Pb	SE_²⁰⁸Pb/²⁰⁶Pb	²⁰⁷Pb/²⁰⁶Pb	SE_²⁰⁷Pb/²⁰⁶Pb		Efficency
PDLW2-solution		18.0447	0.000737927	15.6164	0.00071298	38.1739	0.00199782	2.11548	4.22676e-05	0.865428	1.28516e-05
PDLW2-solution		18.0438	0.000647564	15.6153	0.000689448	38.1708	0.00182657	2.11542	4.16227e-05	0.865412	1.32823e-05
PDLW2-solution		18.0439	0.000638882	15.6157	0.000607392	38.1728	0.00168855	2.11553	4.09964e-05	0.865434	1.06334e-05
PDLW2-solution		18.0443	0.000608113	15.6162	0.000595964	38.1737	0.00158691	2.11552	3.69591e-05	0.865434	1.12039e-05
PDLW2-solution		18.0441	0.000871764	15.6163	0.000797408	38.174	0.00215535	2.11556	4.79893e-05	0.865453	1.38278e-05
PDLW2-solution		18.0447	0.000375235	15.6172	0.00036688	38.1765	0.000988196	2.11563	2.18521e-05	0.86547	6.57278e-06
PDLW2-solution		18.0452	0.000737707	15.6168	0.000693331	38.175	0.00184695	2.1155	3.85295e-05	0.865433	1.24598e-05
PDLW2-solution		18.045	0.000697022	15.6165	0.000660981	38.1743	0.00175881	2.11547	3.89769e-05	0.86542	1.1547e-05
PDLW2-solution		18.0452	0.000681783	15.6168	0.000652312	38.1761	0.00188329	2.11556	4.15224e-05	0.865431	1.23607e-05
PDLW2-solution		18.0458	0.000720211	15.6181	0.000718557	38.1779	0.00193248	2.11559	4.40078e-05	0.86547	1.40302e-05
PDLW2-solution		18.0441	0.000663597	15.6159	0.000642655	38.1727	0.00189263	2.1155	4.52648e-05	0.865431	1.23978e-05
PDLW2-solution		18.0447	0.000782663	15.6163	0.000770323	38.1737	0.00215469	2.11547	4.43093e-05	0.865423	1.30929e-05
PDLW2-solution		18.0442	0.000602745	15.6162	0.000573566	38.173	0.00150727	2.1155	3.72829e-05	0.865443	1.246e-05
PDLW2-solution		18.045	0.000615942	15.6165	0.000570429	38.1747	0.00153401	2.1155	3.43391e-05	0.865422	9.95867e-06
PDLW2-solution		18.0447	0.000346375	15.6172	0.000366631	38.1763	0.00104416	2.11563	2.47422e-05	0.865472	6.73323e-06
PDLW2-solution		18.045	0.000322907	15.6175	0.000313583	38.1774	0.000857332	2.11565	1.78307e-05	0.865481	5.17718e-06
PDLW2-solution		18.0447	0.000325757	15.6174	0.000328084	38.1766	0.000907497	2.11564	2.11849e-05	0.865482	6.76759e-06
PDLW2-solution		18.044	0.00071371	15.6162	0.000644902	38.1734	0.00174566	2.11554	4.03272e-05	0.865452	1.36737e-05
PDLW2-solution		18.0445	0.000660344	15.616	0.000646552	38.1727	0.00175398	2.11545	3.91354e-05	0.865415	1.22132e-05
PDLW2-solution		18.044	0.000683431	15.6159	0.000640418	38.1728	0.00168386	2.1155	3.52942e-05	0.865431	1.13821e-05
PDLW2-solution		18.0449	0.000610396	15.6167	0.000607401	38.1757	0.00164514	2.11557	3.67733e-05	0.865437	1.12121e-05
PDLW2-solution		18.044	0.000786695	15.6156	0.000790335	38.1717	0.00216127	2.11545	4.97689e-05	0.865417	1.52126e-05
PDLW2-solution		18.0431	0.000698524	15.6145	0.000658869	38.1691	0.00181291	2.11541	4.17655e-05	0.865403	1.29127e-05
PDLW2-solution		18.0449	0.000602856	15.6168	0.000614527	38.1748	0.00172527	2.11551	4.25197e-05	0.865442	1.17808e-05
PDLW2-solution		18.0457	0.000707926	15.6175	0.000693866	38.1781	0.00185105	2.1156	3.77626e-05	0.865441	1.14537e-05
PDLW2-solution		18.0444	0.000354619	15.6169	0.00035625	38.1754	0.000973081	2.11561	2.20886e-05	0.865473	6.56855e-06
PDLW2-solution		18.0452	0.000833915	15.6173	0.000815708	38.176	0.00221049	2.11555	5.13827e-05	0.865458	1.4976e-05
PDLW2-solution		18.0434	0.000742616	15.6151	0.000735739	38.1706	0.00214827	2.11546	4.90249e-05	0.86542	1.36558e-05
PDLW2-solution		18.0438	0.000686536	15.6158	0.00064657	38.1723	0.00175159	2.11551	3.90783e-05	0.865443	1.29752e-05
PDLW2-solution		18.0448	0.000628291	15.6164	0.000608367	38.1747	0.00163775	2.11553	3.6755e-05	0.865429	1.13365e-05
PDLW2-solution		18.0456	0.00071399	15.6169	0.00067773	38.1759	0.00182091	2.11549	3.87479e-05	0.865415	1.21814e-05
PDLW2-solution		18.0443	0.00070497	15.616	0.000669081	38.1728	0.0018024	2.11548	3.96043e-05	0.865426	1.18633e-05
PDLW2-solution		18.0443	0.000690391	15.6162	0.000635976	38.174	0.00181113	2.11554	3.69083e-05	0.86544	1.16904e-05
PDLW2-solution		18.0449	0.000820274	15.6175	0.000785273	38.1768	0.00223606	2.11563	5.08299e-05	0.865481	1.28008e-05
PDLW2-solution		18.044	0.000649589	15.6153	0.00065728	38.1702	0.0018831	2.11537	4.56139e-05	0.865405	1.32603e-05
PDLW2-solution		18.0439	0.000738658	15.6155	0.000711066	38.1719	0.00191388	2.11547	3.97223e-05	0.865415	1.17232e-05
PDLW2-solution		18.0445	0.000635556	15.6165	0.000611178	38.1749	0.0017646	2.11557	3.90428e-05	0.865444	1.07211e-05
PDLW2-solution		18.0446	0.000693026	15.6164	0.000671441	38.1739	0.00179912	2.1155	3.95187e-05	0.865437	1.20828e-05
PDLW2-solution		18.045	0.000684021	15.6166	0.000648071	38.1746	0.00170671	2.1155	3.569e-05	0.865428	1.11043e-05
PDLW2-solution		18.0457	0.000651131	15.6174	0.000641688	38.1773	0.00170168	2.11556	3.63118e-05	0.86544	1.16331e-05
PDLW2-10.2	20.25	18.0455	0.0025	15.6166	0.0021	38.1738	0.0048	2.11542	0.00022	0.865401	0.00011
PDLW2-10.2	20.86	18.0436	0.0022	15.6149	0.0023	38.1691	0.0052	2.11538	0.00022	0.865398	0.00011
PDLW2-10.2	21.4	18.0436	0.0021	15.616	0.0019	38.1734	0.0042	2.11562	0.00023	0.865459	0.00011
PDLW2-10.2	21.54	18.0452	0.0025	15.617	0.0022	38.1764	0.0048	2.1156	0.00021	0.865438	0.00011
PDLW2-10.2	21.6	18.0474	0.0023	15.6182	0.0021	38.1789	0.0047	2.11548	0.00021	0.865399	0.00011
PDLW2-10.2	21.3	18.046	0.0023	15.6164	0.0017	38.1736	0.004	2.11535	0.00024	0.865366	0.00012
PDLW2-10.2	22.38	18.0453	0.002	15.6156	0.0018	38.1703	0.0046	2.11525	0.00019	0.865356	9.2e-05
PDLW2-10.2	22	18.0451	0.0026	15.618	0.0019	38.1785	0.0046	2.11573	0.00023	0.865498	0.00012
PDLW2-10.2	20.85	18.0447	0.0023	15.6163	0.0019	38.1736	0.0047	2.1155	0.00018	0.865423	9.2e-05
PDLW2-10.2	21.22	18.0461	0.0023	15.6176	0.0021	38.1792	0.0049	2.11565	0.00018	0.865428	0.0001
PDLW2-10.2	21.43	18.0433	0.002	15.6152	0.0016	38.1727	0.0038	2.11562	0.00018	0.865429	9.3e-05
PDLW2-10.2	21.95	18.0464	0.0024	15.6179	0.002	38.177	0.0049	2.11549	0.00021	0.86543	0.0001
PDLW2-10.2	15.79	18.0466	0.0027	15.6181	0.0023	38.1802	0.0053	2.11565	0.00019	0.865432	9.5e-05
PDLW2-10.2	15.33	18.0434	0.0028	15.6161	0.0025	38.1741	0.0057	2.11568	0.00019	0.865474	8.7e-05
PDLW2-10.2	15.07	18.0492	0.0025	15.6211	0.0023	38.1874	0.0053	2.11574	0.00019	0.865473	9.1e-05
PDLW2-10.2	14.72	18.0441	0.0027	15.6165	0.0025	38.1757	0.0058	2.11569	0.00021	0.865463	0.0001
PDLW2-14.7	14.21	18.0467	0.0017	15.6185	0.0015	38.1805	0.0036	2.11565	9.2e-05	0.865449	4.8e-05
PDLW2-14.7	14.33	18.0456	0.0019	15.6174	0.0016	38.177	0.0037	2.11558	9.8e-05	0.865441	4.7e-05
PDLW2-14.7	14.04	18.0457	0.0018	15.6179	0.0015	38.179	0.0037	2.11568	0.0001	0.865464	5e-05
PDLW2-14.7	13.77	18.0446	0.0018	15.616	0.0015	38.1745	0.0036	2.11556	8.8e-05	0.865411	4.5e-05
PDLW2-14.7	13.62	18.0455	0.0019	15.6177	0.0016	38.1782	0.0039	2.11566	9.5e-05	0.865462	4.9e-05
PDLW2-14.7	13.8	18.0464	0.0018	15.6185	0.0015	38.1808	0.0035	2.1157	8.7e-05	0.865463	4.4e-05
PDLW2-14.7	8.64	18.046	0.0024	15.617	0.0023	38.1737	0.0055	2.11536	9.9e-05	0.8654	4.4e-05
PDLW2-14.7	8.87	18.0429	0.0024	15.6146	0.0021	38.1682	0.0052	2.11541	0.0001	0.865415	4.5e-05
PDLW2-14.7	8.78	18.0428	0.0025	15.614	0.0021	38.1684	0.0049	2.11544	9.9e-05	0.865387	4.9e-05
PDLW2-14.7	8.86	18.0432	0.0026	15.6137	0.0022	38.1666	0.0055	2.11529	9.7e-05	0.865351	4.7e-05
PDLW2-14.7	11.79	18.0441	0.0022	15.6146	0.002	38.1687	0.0047	2.1153	0.00014	0.865358	7e-05
PDLW2-14.7	13.6	18.0449	0.002	15.6161	0.0018	38.1732	0.0042	2.11546	0.00011	0.865402	6.1e-05
PDLW2-14.7	13.45	18.0427	0.0021	15.6145	0.0017	38.1695	0.0039	2.11551	0.00013	0.865419	6.5e-05
PDLW2-14.7	13.53	18.0441	0.002	15.6158	0.0017	38.1718	0.0042	2.11547	0.00013	0.865424	6.1e-05
PDLW2-14.7	13.25	18.0458	0.0019	15.6171	0.0016	38.1748	0.004	2.11544	0.00014	0.865415	7.4e-05
PDLW2-14.7	13.09	18.0462	0.0023	15.6174	0.0022	38.1771	0.0051	2.11552	0.00016	0.865412	8e-05
PDLW2-14.7	13.32	18.0421	0.0022	15.6154	0.0021	38.1731	0.0049	2.11578	0.00021	0.865498	0.0001
PDLW2-14.7	11.43	18.0447	0.0022	15.6155	0.0018	38.1684	0.0045	2.11521	0.00016	0.865379	7.4e-05
PDLW2-14.7	14.78	18.0464	0.002	15.6179	0.0021	38.1788	0.0049	2.11559	0.00014	0.86543	7.1e-05
PDLW2-14.7	13.95	18.0469	0.002	15.6178	0.0017	38.1788	0.0043	2.11553	0.00012	0.865401	6.2e-05
PDLW2-14.7	12.75	18.0452	0.0022	15.6168	0.0018	38.1756	0.0044	2.11555	0.00013	0.865427	6.4e-05
PDLW2-14.7	11.05	18.0452	0.0021	15.6169	0.002	38.1763	0.0047	2.11559	0.00011	0.865432	5.6e-05
PDLW2-14.7	10.96	18.044	0.0023	15.6157	0.002	38.1729	0.0049	2.11555	0.00014	0.865423	6.7e-05
PDLW2-14.7	12.05	18.0455	0.0022	15.616	0.0019	38.1759	0.0044	2.11554	0.00015	0.865368	7.9e-05
PDLW2-14.7	12.27	18.0454	0.0019	15.6168	0.0018	38.1775	0.004	2.11564	0.00015	0.865417	6.9e-05
PDLW2-14.7	12.4	18.0486	0.0024	15.6201	0.0019	38.1867	0.0045	2.11577	0.00018	0.865447	8.8e-05
PDLW2-14.7	8.37	18.0445	0.0032	15.6155	0.0026	38.1712	0.0064	2.11539	0.00015	0.865388	8.2e-05
PDLW2-14.7	6.7	18.0436	0.0031	15.6146	0.0028	38.1699	0.0063	2.11543	0.00018	0.865382	9.6e-05

## Sheet: 20 vs 10 PDLW2
sample		²⁰⁶Pb/²⁰⁴Pb	SE_²⁰⁶Pb/²⁰⁴Pb	²⁰⁷Pb/²⁰⁴Pb	SE_²⁰⁷Pb/²⁰⁴Pb	²⁰⁸Pb/²⁰⁴Pb	SE_²⁰⁸Pb/²⁰⁴Pb	²⁰⁸Pb/²⁰⁶Pb	SE_²⁰⁸Pb/²⁰⁶Pb	²⁰⁷Pb/²⁰⁶Pb	SE_²⁰⁷Pb/²⁰⁶Pb
PDLW2-solution		18.0447	0.000737927	15.6164	0.00071298	38.1739	0.00199782	2.11548	4.22676e-05	0.865428	1.28516e-05
PDLW2-solution		18.0438	0.000647564	15.6153	0.000689448	38.1708	0.00182657	2.11542	4.16227e-05	0.865412	1.32823e-05
PDLW2-solution		18.0439	0.000638882	15.6157	0.000607392	38.1728	0.00168855	2.11553	4.09964e-05	0.865434	1.06334e-05
PDLW2-solution		18.0443	0.000608113	15.6162	0.000595964	38.1737	0.00158691	2.11552	3.69591e-05	0.865434	1.12039e-05
PDLW2-solution		18.0441	0.000871764	15.6163	0.000797408	38.174	0.00215535	2.11556	4.79893e-05	0.865453	1.38278e-05
PDLW2-solution		18.0447	0.000375235	15.6172	0.00036688	38.1765	0.000988196	2.11563	2.18521e-05	0.86547	6.57278e-06
PDLW2-solution		18.0452	0.000737707	15.6168	0.000693331	38.175	0.00184695	2.1155	3.85295e-05	0.865433	1.24598e-05
PDLW2-solution		18.045	0.000697022	15.6165	0.000660981	38.1743	0.00175881	2.11547	3.89769e-05	0.86542	1.1547e-05
PDLW2-solution		18.0452	0.000681783	15.6168	0.000652312	38.1761	0.00188329	2.11556	4.15224e-05	0.865431	1.23607e-05
PDLW2-solution		18.0458	0.000720211	15.6181	0.000718557	38.1779	0.00193248	2.11559	4.40078e-05	0.86547	1.40302e-05
PDLW2-solution		18.0441	0.000663597	15.6159	0.000642655	38.1727	0.00189263	2.1155	4.52648e-05	0.865431	1.23978e-05
PDLW2-solution		18.0447	0.000782663	15.6163	0.000770323	38.1737	0.00215469	2.11547	4.43093e-05	0.865423	1.30929e-05
PDLW2-solution		18.0442	0.000602745	15.6162	0.000573566	38.173	0.00150727	2.1155	3.72829e-05	0.865443	1.246e-05
PDLW2-solution		18.045	0.000615942	15.6165	0.000570429	38.1747	0.00153401	2.1155	3.43391e-05	0.865422	9.95867e-06
PDLW2-solution		18.0447	0.000346375	15.6172	0.000366631	38.1763	0.00104416	2.11563	2.47422e-05	0.865472	6.73323e-06
PDLW2-solution		18.045	0.000322907	15.6175	0.000313583	38.1774	0.000857332	2.11565	1.78307e-05	0.865481	5.17718e-06
PDLW2-solution		18.0447	0.000325757	15.6174	0.000328084	38.1766	0.000907497	2.11564	2.11849e-05	0.865482	6.76759e-06
PDLW2-solution		18.044	0.00071371	15.6162	0.000644902	38.1734	0.00174566	2.11554	4.03272e-05	0.865452	1.36737e-05
PDLW2-solution		18.0445	0.000660344	15.616	0.000646552	38.1727	0.00175398	2.11545	3.91354e-05	0.865415	1.22132e-05
PDLW2-solution		18.044	0.000683431	15.6159	0.000640418	38.1728	0.00168386	2.1155	3.52942e-05	0.865431	1.13821e-05
PDLW2-solution		18.0449	0.000610396	15.6167	0.000607401	38.1757	0.00164514	2.11557	3.67733e-05	0.865437	1.12121e-05
PDLW2-solution		18.044	0.000786695	15.6156	0.000790335	38.1717	0.00216127	2.11545	4.97689e-05	0.865417	1.52126e-05
PDLW2-solution		18.0431	0.000698524	15.6145	0.000658869	38.1691	0.00181291	2.11541	4.17655e-05	0.865403	1.29127e-05
PDLW2-solution		18.0449	0.000602856	15.6168	0.000614527	38.1748	0.00172527	2.11551	4.25197e-05	0.865442	1.17808e-05
PDLW2-solution		18.0457	0.000707926	15.6175	0.000693866	38.1781	0.00185105	2.1156	3.77626e-05	0.865441	1.14537e-05
PDLW2-solution		18.0444	0.000354619	15.6169	0.00035625	38.1754	0.000973081	2.11561	2.20886e-05	0.865473	6.56855e-06
PDLW2-solution		18.0452	0.000833915	15.6173	0.000815708	38.176	0.00221049	2.11555	5.13827e-05	0.865458	1.4976e-05
PDLW2-solution		18.0434	0.000742616	15.6151	0.000735739	38.1706	0.00214827	2.11546	4.90249e-05	0.86542	1.36558e-05
PDLW2-solution		18.0438	0.000686536	15.6158	0.00064657	38.1723	0.00175159	2.11551	3.90783e-05	0.865443	1.29752e-05
PDLW2-solution		18.0448	0.000628291	15.6164	0.000608367	38.1747	0.00163775	2.11553	3.6755e-05	0.865429	1.13365e-05
PDLW2-solution		18.0456	0.00071399	15.6169	0.00067773	38.1759	0.00182091	2.11549	3.87479e-05	0.865415	1.21814e-05
PDLW2-solution		18.0443	0.00070497	15.616	0.000669081	38.1728	0.0018024	2.11548	3.96043e-05	0.865426	1.18633e-05
PDLW2-solution		18.0443	0.000690391	15.6162	0.000635976	38.174	0.00181113	2.11554	3.69083e-05	0.86544	1.16904e-05
PDLW2-solution		18.0449	0.000820274	15.6175	0.000785273	38.1768	0.00223606	2.11563	5.08299e-05	0.865481	1.28008e-05
PDLW2-solution		18.044	0.000649589	15.6153	0.00065728	38.1702	0.0018831	2.11537	4.56139e-05	0.865405	1.32603e-05
PDLW2-solution		18.0439	0.000738658	15.6155	0.000711066	38.1719	0.00191388	2.11547	3.97223e-05	0.865415	1.17232e-05
PDLW2-solution		18.0445	0.000635556	15.6165	0.000611178	38.1749	0.0017646	2.11557	3.90428e-05	0.865444	1.07211e-05
PDLW2-solution		18.0446	0.000693026	15.6164	0.000671441	38.1739	0.00179912	2.1155	3.95187e-05	0.865437	1.20828e-05
PDLW2-solution		18.045	0.000684021	15.6166	0.000648071	38.1746	0.00170671	2.1155	3.569e-05	0.865428	1.11043e-05
PDLW2-solution		18.0457	0.000651131	15.6174	0.000641688	38.1773	0.00170168	2.11556	3.63118e-05	0.86544	1.16331e-05
PDLW2 long		18.0467	0.0017	15.6185	0.0015	38.1805	0.0036	2.11565	9.2e-05	0.865449	4.8e-05
PDLW2 long		18.0456	0.0019	15.6174	0.0016	38.177	0.0037	2.11558	9.8e-05	0.865441	4.7e-05
PDLW2 long		18.0457	0.0018	15.6179	0.0015	38.179	0.0037	2.11568	0.0001	0.865464	5e-05
PDLW2 long		18.0446	0.0018	15.616	0.0015	38.1745	0.0036	2.11556	8.8e-05	0.865411	4.5e-05
PDLW2 long		18.0455	0.0019	15.6177	0.0016	38.1782	0.0039	2.11566	9.5e-05	0.865462	4.9e-05
PDLW2 long		18.0464	0.0018	15.6185	0.0015	38.1808	0.0035	2.1157	8.7e-05	0.865463	4.4e-05
PDLW2 long		18.046	0.0024	15.617	0.0023	38.1737	0.0055	2.11536	9.9e-05	0.8654	4.4e-05
PDLW2 long		18.0429	0.0024	15.6146	0.0021	38.1682	0.0052	2.11541	0.0001	0.865415	4.5e-05
PDLW2 long		18.0428	0.0025	15.614	0.0021	38.1684	0.0049	2.11544	9.9e-05	0.865387	4.9e-05
PDLW2 long		18.0432	0.0026	15.6137	0.0022	38.1666	0.0055	2.11529	9.7e-05	0.865351	4.7e-05
PDLW2 long		18.0441	0.0022	15.6146	0.002	38.1687	0.0047	2.1153	0.00014	0.865358	7e-05
PDLW2 long		18.0449	0.002	15.6161	0.0018	38.1732	0.0042	2.11546	0.00011	0.865402	6.1e-05
PDLW2 long		18.0427	0.0021	15.6145	0.0017	38.1695	0.0039	2.11551	0.00013	0.865419	6.5e-05
PDLW2 long		18.0441	0.002	15.6158	0.0017	38.1718	0.0042	2.11547	0.00013	0.865424	6.1e-05
PDLW2 long		18.0458	0.0019	15.6171	0.0016	38.1748	0.004	2.11544	0.00014	0.865415	7.4e-05
PDLW2 long		18.0462	0.0023	15.6174	0.0022	38.1771	0.0051	2.11552	0.00016	0.865412	8e-05
PDLW2 long		18.0421	0.0022	15.6154	0.0021	38.1731	0.0049	2.11578	0.00021	0.865498	0.0001
PDLW2 long		18.0447	0.0022	15.6155	0.0018	38.1684	0.0045	2.11521	0.00016	0.865379	7.4e-05
PDLW2 long		18.0464	0.002	15.6179	0.0021	38.1788	0.0049	2.11559	0.00014	0.86543	7.1e-05
PDLW2 long		18.0469	0.002	15.6178	0.0017	38.1788	0.0043	2.11553	0.00012	0.865401	6.2e-05
PDLW2 long		18.0452	0.0022	15.6168	0.0018	38.1756	0.0044	2.11555	0.00013	0.865427	6.4e-05
PDLW2 long		18.0452	0.0021	15.6169	0.002	38.1763	0.0047	2.11559	0.00011	0.865432	5.6e-05
PDLW2 long		18.044	0.0023	15.6157	0.002	38.1729	0.0049	2.11555	0.00014	0.865423	6.7e-05
PDLW2 long		18.0455	0.0022	15.616	0.0019	38.1759	0.0044	2.11554	0.00015	0.865368	7.9e-05
PDLW2 long		18.0454	0.0019	15.6168	0.0018	38.1775	0.004	2.11564	0.00015	0.865417	6.9e-05
PDLW2 long		18.0486	0.0024	15.6201	0.0019	38.1867	0.0045	2.11577	0.00018	0.865447	8.8e-05
PDLW2 long		18.0445	0.0032	15.6155	0.0026	38.1712	0.0064	2.11539	0.00015	0.865388	8.2e-05
PDLW2 long		18.0436	0.0031	15.6146	0.0028	38.1699	0.0063	2.11543	0.00018	0.865382	9.6e-05
PDLW2 short		18.0432	0.0029	15.6162	0.0028	38.1755	0.0064	2.11578	0.0002	0.865489	0.0001
PDLW2 short		18.0458	0.0036	15.6185	0.0024	38.1775	0.006	2.11559	0.00029	0.865492	0.00014
PDLW2 short		18.0461	0.0034	15.6182	0.0029	38.1784	0.0075	2.1156	0.0002	0.865461	0.00011
PDLW2 short		18.0457	0.0032	15.618	0.0024	38.1789	0.0058	2.11568	0.00027	0.865469	0.00012
PDLW2 short		18.0464	0.0029	15.6184	0.0025	38.1805	0.0061	2.11569	0.00021	0.865458	0.00012
PDLW2 short		18.0467	0.0035	15.6185	0.0028	38.1809	0.0065	2.11567	0.00026	0.865449	0.00013
PDLW2 short		18.0451	0.0033	15.6163	0.002	38.1765	0.0052	2.11562	0.00023	0.865404	0.00011
PDLW2 short		18.0451	0.0032	15.6173	0.0026	38.1747	0.0062	2.11552	0.00021	0.865459	0.00011
PDLW2 short		18.0445	0.0036	15.6184	0.0027	38.1764	0.0072	2.11568	0.0002	0.865549	0.00011
PDLW2 short		18.0472	0.005	15.6179	0.0042	38.18	0.01	2.11556	0.00023	0.865392	0.00012
PDLW2 short		18.045	0.0034	15.6179	0.0028	38.1769	0.0061	2.11565	0.00021	0.865497	0.00011
PDLW2 short		18.0462	0.0044	15.6179	0.0041	38.1785	0.0097	2.1156	0.00026	0.86544	0.00013
PDLW2 short		18.0465	0.0039	15.6187	0.0038	38.1803	0.0087	2.11566	0.00028	0.86547	0.00014
PDLW2 short		18.0462	0.0035	15.6178	0.0036	38.1774	0.0081	2.11554	0.00026	0.865434	0.00014
PDLW2 short		18.04	0.0048	15.6114	0.0042	38.161	0.01	2.11535	0.00025	0.865377	0.00012
PDLW2 short		18.0439	0.0048	15.615	0.0042	38.172	0.01	2.11551	0.00024	0.865389	0.00012
PDLW2 short		18.0479	0.0043	15.6189	0.0037	38.1821	0.0092	2.1156	0.00021	0.865414	8.8e-05
PDLW2 short		18.0458	0.004	15.6175	0.0037	38.1783	0.0089	2.11563	0.00018	0.865437	7.5e-05
PDLW2 short		18.0507	0.0063	15.6218	0.0062	38.186	0.014	2.11549	0.00025	0.86544	0.00012

## Sheet: 20 vs 10 GN
sample		²⁰⁶Pb/²⁰⁴Pb	SE_²⁰⁶Pb/²⁰⁴Pb	²⁰⁷Pb/²⁰⁴Pb	SE_²⁰⁷Pb/²⁰⁴Pb	²⁰⁸Pb/²⁰⁴Pb	SE_²⁰⁸Pb/²⁰⁴Pb	²⁰⁸Pb/²⁰⁶Pb	SE_²⁰⁸Pb/²⁰⁶Pb	²⁰⁷Pb/²⁰⁶Pb	SE_²⁰⁷Pb/²⁰⁶Pb
GN-solution		18.3797	0.000515032	15.6772	0.00046983	38.5431	0.00129975	2.09702	2.45576e-05	0.852963	7.20234e-06
GN-solution		18.38	0.000400487	15.6774	0.000383584	38.5437	0.000997844	2.09701	1.73814e-05	0.85296	5.61119e-06
GN-solution		18.3794	0.000397391	15.677	0.000357827	38.5418	0.000956158	2.09698	1.93831e-05	0.85297	5.30709e-06
GN-solution		18.3795	0.00050776	15.6769	0.00048726	38.5421	0.00133916	2.09699	2.18036e-05	0.852961	6.79221e-06
GN-solution		18.3795	0.000371329	15.6769	0.000367798	38.5425	0.000995748	2.09701	2.40118e-05	0.852958	6.78758e-06
GN-solution		18.3786	0.000816517	15.6751	0.000777584	38.5362	0.00205754	2.09677	3.81499e-05	0.852901	1.18702e-05
GN-solution		18.3788	0.000716748	15.6753	0.000685503	38.5371	0.00188035	2.0968	4.00317e-05	0.852902	1.21301e-05
GN-solution		18.3801	0.000722544	15.6769	0.000719821	38.5419	0.00194402	2.09691	3.95518e-05	0.852931	1.21368e-05
GN-solution		18.3796	0.00060193	15.6763	0.000569031	38.5411	0.00158057	2.09692	3.61943e-05	0.852917	9.55787e-06
GN-solution		18.378	0.000801925	15.6754	0.000779656	38.5375	0.00218116	2.0969	5.26586e-05	0.85294	1.62504e-05
GN-solution		18.3781	0.000957573	15.6756	0.000855709	38.5382	0.0023502	2.09694	5.14564e-05	0.85295	1.25017e-05
GN-solution		18.3772	0.000739702	15.6741	0.000707415	38.534	0.00193519	2.09682	4.11677e-05	0.852914	1.14623e-05
GN-solution		18.3776	0.00081863	15.6743	0.000776225	38.5347	0.00205532	2.0968	4.0423e-05	0.852902	1.29311e-05
GN-solution		18.3797	0.000748928	15.6765	0.000689172	38.5403	0.00187726	2.09687	3.8717e-05	0.852927	1.25784e-05
GN-solution		18.3797	0.000670904	15.6765	0.000626057	38.5413	0.0017282	2.09692	3.53718e-05	0.852922	1.01347e-05
GN-solution		18.3784	0.000768184	15.6759	0.000724828	38.5396	0.0020454	2.09698	4.96702e-05	0.852953	1.48925e-05
GN-solution		18.3784	0.000770619	15.6746	0.000733518	38.5358	0.00207441	2.09678	4.10221e-05	0.852885	1.21075e-05
GN-solution		18.3796	0.000706668	15.6764	0.000706056	38.5399	0.00185956	2.09686	4.06243e-05	0.852923	1.30416e-05
GN-solution		18.379	0.000671455	15.6759	0.000663388	38.5386	0.00178467	2.09686	3.61591e-05	0.852925	1.13947e-05
GN-solution		18.3789	0.000773571	15.6756	0.000708393	38.5391	0.00192237	2.09689	3.99568e-05	0.852915	1.11508e-05
GN-solution		18.379	0.000834632	15.6768	0.000753387	38.5424	0.00207006	2.09706	4.67771e-05	0.852974	1.38416e-05
GN-solution		18.3788	0.000694351	15.6753	0.000655449	38.5372	0.00180785	2.09681	4.37804e-05	0.852902	1.34169e-05
GN-solution		18.3784	0.000712524	15.6756	0.000657211	38.5382	0.00185385	2.09691	3.72356e-05	0.852938	1.11414e-05
GN-solution		18.3793	0.000665186	15.6762	0.000625963	38.5404	0.00167045	2.09692	3.66184e-05	0.852928	1.12921e-05
GN-solution		18.3799	0.000841895	15.6773	0.000777553	38.5433	0.00217332	2.09701	4.49931e-05	0.852963	1.35471e-05
GN-solution		18.3785	0.000641323	15.6751	0.000661079	38.5368	0.00188523	2.09681	4.67451e-05	0.852904	1.35511e-05
GN-solution		18.3777	0.00065247	15.6748	0.000614106	38.5359	0.00169038	2.09686	3.902e-05	0.852925	1.20902e-05
GN-solution		18.379	0.000601215	15.6759	0.000570632	38.5395	0.00152296	2.0969	3.77823e-05	0.852922	1.10603e-05
GN-solution		18.379	0.000624399	15.6757	0.000599102	38.5387	0.00164112	2.09686	4.08885e-05	0.852913	1.28573e-05
GN-solution		18.3795	0.000667823	15.6761	0.000643451	38.5404	0.00183644	2.09689	3.93697e-05	0.852911	1.06742e-05
GN-solution		18.3813	0.000626927	15.6782	0.000589679	38.5463	0.00169351	2.09701	3.73716e-05	0.852942	1.14676e-05
GN-solution		18.3792	0.000716212	15.6756	0.000679362	38.5386	0.00176064	2.09683	3.47206e-05	0.852901	1.18853e-05
GN-solution		18.3789	0.000645268	15.6756	0.000626245	38.5386	0.00165938	2.09687	3.83742e-05	0.852916	1.36894e-05
GN-solution		18.3802	0.000622953	15.6769	0.000617563	38.5425	0.00167598	2.09693	3.66695e-05	0.852925	1.14142e-05
GN-solution		18.3791	0.000591684	15.6756	0.000580799	38.5388	0.00161682	2.09685	4.01382e-05	0.852903	1.25355e-05
GN-solution		18.3791	0.000660586	15.6754	0.000634928	38.5373	0.00183251	2.09677	3.8768e-05	0.852892	1.05001e-05
GN-solution		18.3811	0.000603547	15.678	0.000586795	38.5451	0.00163511	2.09697	3.68467e-05	0.852943	1.14292e-05
GN-solution		18.3796	0.000694895	15.6762	0.0006567	38.5397	0.00174036	2.09684	3.71159e-05	0.85291	1.19463e-05
GN-solution		18.3795	0.000594036	15.6759	0.000568038	38.5396	0.00154806	2.09686	3.92288e-05	0.852904	1.32909e-05
GN-solution		18.3802	0.000623682	15.6771	0.00061833	38.5431	0.00171488	2.09697	3.90686e-05	0.852937	1.13666e-05
GN long		18.3767	0.0026	15.6739	0.0022	38.5356	0.0051	2.09698	0.0001	0.852922	4e-05
GN long		18.3772	0.0026	15.6741	0.0022	38.5364	0.0055	2.09697	0.00011	0.85291	5.3e-05
GN long		18.3795	0.0023	15.6764	0.002	38.5407	0.0047	2.09694	0.00011	0.852929	5.8e-05
GN long		18.3791	0.0021	15.6761	0.0021	38.5399	0.0046	2.09694	0.00011	0.852931	5.7e-05
GN long		18.3822	0.0025	15.6781	0.0019	38.5453	0.0049	2.09688	0.00012	0.852896	5.9e-05
GN long		18.3822	0.0024	15.6794	0.0021	38.5476	0.0047	2.09701	0.00014	0.852966	7.2e-05
GN long		18.3822	0.002	15.6782	0.002	38.547	0.0046	2.09697	0.00011	0.852901	6e-05
GN long		18.3787	0.0025	15.6761	0.0019	38.5396	0.0048	2.09697	0.00014	0.852949	7.2e-05
GN long		18.3787	0.0037	15.6785	0.0031	38.5485	0.0079	2.09746	0.00019	0.85308	9.2e-05
GN long		18.3805	0.0033	15.6788	0.0027	38.5469	0.0064	2.09716	0.00016	0.853013	8.2e-05
GN long		18.3859	0.0032	15.6821	0.0027	38.5582	0.0066	2.09716	0.00016	0.852942	8e-05
GN long		18.3801	0.0031	15.6763	0.0028	38.5408	0.0065	2.09688	0.00017	0.852895	8.6e-05
GN long		18.3817	0.0028	15.6787	0.0025	38.5467	0.0058	2.09701	0.00018	0.852952	9.2e-05
GN long		18.3859	0.0029	15.6813	0.0024	38.5548	0.0057	2.09698	0.00019	0.852898	9.9e-05
GN long		18.3796	0.0029	15.6778	0.0025	38.5462	0.0058	2.09723	0.00018	0.853	8.8e-05
GN long		18.3803	0.003	15.6779	0.0027	38.5431	0.0062	2.09698	0.00019	0.852973	9.5e-05
GN long		18.3823	0.0028	15.6786	0.0025	38.5485	0.0059	2.09704	0.00014	0.852918	6.8e-05
GN long		18.3802	0.0025	15.6776	0.0024	38.5465	0.0054	2.09718	0.00014	0.852961	7.1e-05
GN long		18.3822	0.0032	15.6795	0.0029	38.5523	0.007	2.09726	0.00015	0.852972	7.2e-05
GN long		18.3827	0.003	15.6805	0.0028	38.5548	0.007	2.09734	0.00015	0.853003	6.6e-05
GN long		18.3829	0.0028	15.681	0.0024	38.5579	0.0059	2.09749	0.00014	0.853021	6.1e-05
GN long		18.3853	0.0029	15.6827	0.0024	38.5616	0.0058	2.09741	0.00012	0.853002	5.7e-05
GN long		18.383	0.0025	15.6804	0.0023	38.5535	0.0054	2.09724	0.00011	0.852984	5.7e-05
GN long		18.3799	0.0028	15.6763	0.0024	38.5405	0.0057	2.09688	0.00014	0.852905	6.8e-05
GN long		18.3792	0.0028	15.6756	0.0027	38.539	0.0063	2.09688	0.00012	0.852899	6.1e-05
GN long		18.376	0.0028	15.6723	0.0025	38.5304	0.006	2.09678	0.00012	0.852868	5.9e-05
GN long		18.3806	0.0025	15.6767	0.0021	38.5421	0.0052	2.09689	0.00011	0.852894	6e-05
GN long		18.3783	0.0022	15.6742	0.0017	38.5381	0.0041	2.09693	0.00013	0.852865	6.1e-05
GN short		18.3824	0.0044	15.6785	0.0037	38.55	0.0092	2.09711	0.00021	0.852908	0.00014
GN short		18.3843	0.0049	15.682	0.0044	38.557	0.011	2.09728	0.00027	0.85301	0.00015
GN short		18.385	0.0052	15.6814	0.0037	38.5562	0.0097	2.09716	0.00026	0.852945	0.00013
GN short		18.3812	0.0047	15.678	0.0045	38.55	0.011	2.09725	0.00026	0.852937	0.00012
GN short		18.3846	0.0042	15.6826	0.0036	38.5559	0.0086	2.09718	0.00028	0.853029	0.00016
GN short		18.3858	0.0044	15.682	0.0046	38.557	0.01	2.09711	0.00029	0.852941	0.00014
GN short		18.3812	0.0048	15.6783	0.0042	38.5484	0.0099	2.09716	0.00028	0.852953	0.00013
GN short		18.382	0.0042	15.6789	0.004	38.5503	0.0095	2.09718	0.00032	0.852949	0.00015
GN short		18.3796	0.0062	15.6765	0.0053	38.547	0.013	2.09727	0.0002	0.852929	0.0001
GN short		18.3823	0.0066	15.6799	0.006	38.55	0.014	2.09713	0.00026	0.852989	0.00012
GN short		18.3819	0.0045	15.6776	0.0039	38.5447	0.0098	2.09688	0.00026	0.852882	0.00014
GN short		18.3765	0.0055	15.6723	0.005	38.53	0.012	2.0967	0.00022	0.852845	0.00012
GN short		18.3853	0.0051	15.6809	0.0049	38.557	0.012	2.09716	0.00028	0.852904	0.00014
GN short		18.3871	0.0057	15.6831	0.0048	38.562	0.012	2.09723	0.00023	0.85294	0.00012
GN short		18.3913	0.0046	15.6851	0.0047	38.568	0.01	2.09708	0.00035	0.852854	0.00015
GN short		18.3789	0.0056	15.6754	0.0046	38.539	0.011	2.09692	0.00028	0.852902	0.00014
GN short		18.3841	0.0044	15.6816	0.004	38.5574	0.0094	2.09732	0.00016	0.852998	7e-05
GN short		18.3818	0.004	15.678	0.0033	38.5509	0.0085	2.09723	0.00022	0.852909	8.5e-05
GN short		18.3814	0.004	15.6782	0.0036	38.5491	0.0088	2.09718	0.00021	0.852938	0.00011
GN short		18.3858	0.0039	15.6845	0.0039	38.5666	0.0091	2.09763	0.0002	0.853077	9.8e-05

## Sheet: Oil PDLW2
	Total beam	²⁰⁶Pb/²⁰⁴Pb	SE_²⁰⁶Pb/²⁰⁴Pb	²⁰⁷Pb/²⁰⁴Pb	SE_²⁰⁷Pb/²⁰⁴Pb	²⁰⁸Pb/²⁰⁴Pb	SE_²⁰⁸Pb/²⁰⁴Pb	²⁰⁸Pb/²⁰⁶Pb	SE_²⁰⁸Pb/²⁰⁶Pb	²⁰⁷Pb/²⁰⁶Pb	SE_²⁰⁷Pb/²⁰⁶Pb
PDLW2 14.7	14.21	18.0467	0.0017	15.6185	0.0015	38.1805	0.0036	2.11565	9.2e-05	0.865449	4.8e-05
PDLW2 14.7	14.33	18.0456	0.0019	15.6174	0.0016	38.177	0.0037	2.11558	9.8e-05	0.865441	4.7e-05
PDLW2 14.7	14.04	18.0457	0.0018	15.6179	0.0015	38.179	0.0037	2.11568	0.0001	0.865464	5e-05
PDLW2 14.7	13.77	18.0446	0.0018	15.616	0.0015	38.1745	0.0036	2.11556	8.8e-05	0.865411	4.5e-05
PDLW2 14.7	13.62	18.0455	0.0019	15.6177	0.0016	38.1782	0.0039	2.11566	9.5e-05	0.865462	4.9e-05
PDLW2 14.7	13.8	18.0464	0.0018	15.6185	0.0015	38.1808	0.0035	2.1157	8.7e-05	0.865463	4.4e-05
PDLW2 14.7	8.64	18.046	0.0024	15.617	0.0023	38.1737	0.0055	2.11536	9.9e-05	0.8654	4.4e-05
PDLW2 14.7	8.87	18.0429	0.0024	15.6146	0.0021	38.1682	0.0052	2.11541	0.0001	0.865415	4.5e-05
PDLW2 14.7	8.78	18.0428	0.0025	15.614	0.0021	38.1684	0.0049	2.11544	9.9e-05	0.865387	4.9e-05
PDLW2 14.7	8.86	18.0432	0.0026	15.6137	0.0022	38.1666	0.0055	2.11529	9.7e-05	0.865351	4.7e-05
PDLW2 14.7	11.79	18.0441	0.0022	15.6146	0.002	38.1687	0.0047	2.1153	0.00014	0.865358	7e-05
PDLW2 14.7	13.6	18.0449	0.002	15.6161	0.0018	38.1732	0.0042	2.11546	0.00011	0.865402	6.1e-05
PDLW2 14.7	13.45	18.0427	0.0021	15.6145	0.0017	38.1695	0.0039	2.11551	0.00013	0.865419	6.5e-05
PDLW2 14.7	13.53	18.0441	0.002	15.6158	0.0017	38.1718	0.0042	2.11547	0.00013	0.865424	6.1e-05
PDLW2 14.7	13.25	18.0458	0.0019	15.6171	0.0016	38.1748	0.004	2.11544	0.00014	0.865415	7.4e-05
PDLW2 14.7	13.09	18.0462	0.0023	15.6174	0.0022	38.1771	0.0051	2.11552	0.00016	0.865412	8e-05
PDLW2 14.7	13.32	18.0421	0.0022	15.6154	0.0021	38.1731	0.0049	2.11578	0.00021	0.865498	0.0001
PDLW2 14.7	11.43	18.0447	0.0022	15.6155	0.0018	38.1684	0.0045	2.11521	0.00016	0.865379	7.4e-05
PDLW2 14.7	14.78	18.0464	0.002	15.6179	0.0021	38.1788	0.0049	2.11559	0.00014	0.86543	7.1e-05
PDLW2 14.7	13.95	18.0469	0.002	15.6178	0.0017	38.1788	0.0043	2.11553	0.00012	0.865401	6.2e-05
PDLW2 14.7	12.75	18.0452	0.0022	15.6168	0.0018	38.1756	0.0044	2.11555	0.00013	0.865427	6.4e-05
PDLW2 14.7	11.05	18.0452	0.0021	15.6169	0.002	38.1763	0.0047	2.11559	0.00011	0.865432	5.6e-05
PDLW2 14.7	10.96	18.044	0.0023	15.6157	0.002	38.1729	0.0049	2.11555	0.00014	0.865423	6.7e-05
PDLW2 14.7	12.05	18.0455	0.0022	15.616	0.0019	38.1759	0.0044	2.11554	0.00015	0.865368	7.9e-05
PDLW2 14.7	12.27	18.0454	0.0019	15.6168	0.0018	38.1775	0.004	2.11564	0.00015	0.865417	6.9e-05
PDLW2 14.7	12.4	18.0486	0.0024	15.6201	0.0019	38.1867	0.0045	2.11577	0.00018	0.865447	8.8e-05
PDLW2 14.7	8.37	18.0445	0.0032	15.6155	0.0026	38.1712	0.0064	2.11539	0.00015	0.865388	8.2e-05
PDLW2 14.7	6.7	18.0436	0.0031	15.6146	0.0028	38.1699	0.0063	2.11543	0.00018	0.865382	9.6e-05
PDLW2-Oil	5.57	18.0389	0.0032	15.6103	0.0032	38.1541	0.0072	2.1151	0.0002	0.865369	0.00011
PDLW2-Oil	6.28	18.0395	0.0038	15.6099	0.003	38.1553	0.0074	2.1151	0.00014	0.865318	7.1e-05
PDLW2-Oil	5.965	18.0407	0.0027	15.6107	0.0024	38.1551	0.0061	2.11495	0.00011	0.865305	5.6e-05
PDLW2-Oil	4.15	18.0412	0.0047	15.6094	0.0043	38.15	0.01	2.1146	0.00016	0.865209	8.1e-05
PDLW2-Oil	9.83	18.0431	0.0025	15.6143	0.0023	38.1639	0.0053	2.11515	0.00011	0.865389	4.5e-05
PDLW2-Oil	6.38	18.0436	0.0035	15.6145	0.003	38.1676	0.0074	2.1153	0.00014	0.865376	6.1e-05
PDLW2-Oil	4.85	18.0445	0.0022	15.6144	0.0022	38.1662	0.0053	2.11512	0.00015	0.865327	7.2e-05
PDLW2-Oil	10.69	18.0445	0.0037	15.6147	0.0032	38.1702	0.0082	2.11534	0.00019	0.865344	9.1e-05
PDLW2-Oil	10.79	18.0446	0.0024	15.6144	0.0024	38.1658	0.006	2.11508	0.00013	0.865323	5.8e-05
PDLW2-Oil	7.55	18.0447	0.0029	15.6148	0.0026	38.1685	0.0064	2.11522	0.00012	0.86534	5.9e-05
PDLW2-Oil	6.473	18.0448	0.0049	15.6145	0.0041	38.167	0.01	2.11512	0.00018	0.865319	9.3e-05
PDLW2-Oil	6.28	18.046	0.0033	15.6174	0.0031	38.1737	0.0074	2.11536	0.00018	0.865422	8.2e-05
PDLW2-Oil	4.3	18.0464	0.0041	15.6168	0.0038	38.1763	0.0094	2.11545	0.0002	0.865369	9.4e-05
PDLW2-Oil	9.97	18.0469	0.0032	15.617	0.0029	38.1766	0.0069	2.11541	0.00016	0.865356	8.6e-05
PDLW2-Oil	7.22	18.0485	0.0032	15.6193	0.0027	38.1802	0.0066	2.11542	0.00011	0.865407	6.3e-05

## Sheet: Oil PDLW2 (2)
	Total beam	²⁰⁶Pb/²⁰⁴Pb	SE_²⁰⁶Pb/²⁰⁴Pb	²⁰⁷Pb/²⁰⁴Pb	SE_²⁰⁷Pb/²⁰⁴Pb	²⁰⁸Pb/²⁰⁴Pb	SE_²⁰⁸Pb/²⁰⁴Pb	²⁰⁸Pb/²⁰⁶Pb	SE_²⁰⁸Pb/²⁰⁶Pb	²⁰⁷Pb/²⁰⁶Pb	SE_²⁰⁷Pb/²⁰⁶Pb
PDLW2-Oil	5.57	18.0389	0.0032	15.6103	0.0032	38.1541	0.0072	2.1151	0.0002	0.865369	0.00011
PDLW2-Oil	6.28	18.0395	0.0038	15.6099	0.003	38.1553	0.0074	2.1151	0.00014	0.865318	7.1e-05
PDLW2-Oil	5.965	18.0407	0.0027	15.6107	0.0024	38.1551	0.0061	2.11495	0.00011	0.865305	5.6e-05
PDLW2-Oil	4.15	18.0412	0.0047	15.6094	0.0043	38.15	0.01	2.1146	0.00016	0.865209	8.1e-05
PDLW2-Oil	9.83	18.0431	0.0025	15.6143	0.0023	38.1639	0.0053	2.11515	0.00011	0.865389	4.5e-05
PDLW2-Oil	6.38	18.0436	0.0035	15.6145	0.003	38.1676	0.0074	2.1153	0.00014	0.865376	6.1e-05
PDLW2-Oil	4.85	18.0445	0.0022	15.6144	0.0022	38.1662	0.0053	2.11512	0.00015	0.865327	7.2e-05
PDLW2-Oil	10.69	18.0445	0.0037	15.6147	0.0032	38.1702	0.0082	2.11534	0.00019	0.865344	9.1e-05
PDLW2-Oil	10.79	18.0446	0.0024	15.6144	0.0024	38.1658	0.006	2.11508	0.00013	0.865323	5.8e-05
PDLW2-Oil	7.55	18.0447	0.0029	15.6148	0.0026	38.1685	0.0064	2.11522	0.00012	0.86534	5.9e-05
PDLW2-Oil	6.473	18.0448	0.0049	15.6145	0.0041	38.167	0.01	2.11512	0.00018	0.865319	9.3e-05
PDLW2-Oil	6.28	18.046	0.0033	15.6174	0.0031	38.1737	0.0074	2.11536	0.00018	0.865422	8.2e-05
PDLW2-Oil	4.3	18.0464	0.0041	15.6168	0.0038	38.1763	0.0094	2.11545	0.0002	0.865369	9.4e-05
PDLW2-Oil	9.97	18.0469	0.0032	15.617	0.0029	38.1766	0.0069	2.11541	0.00016	0.865356	8.6e-05
PDLW2-Oil	7.22	18.0485	0.0032	15.6193	0.0027	38.1802	0.0066	2.11542	0.00011	0.865407	6.3e-05

## Sheet: Oil PDLW1
	Total beam	²⁰⁶Pb/²⁰⁴Pb	SE_²⁰⁶Pb/²⁰⁴Pb	²⁰⁷Pb/²⁰⁴Pb	SE_²⁰⁷Pb/²⁰⁴Pb	²⁰⁸Pb/²⁰⁴Pb	SE_²⁰⁸Pb/²⁰⁴Pb	²⁰⁸Pb/²⁰⁶Pb	SE_²⁰⁸Pb/²⁰⁶Pb	²⁰⁷Pb/²⁰⁶Pb	SE_²⁰⁷Pb/²⁰⁶Pb
PDLW1-Oil		18.0238	0.0067	15.6132	0.0059	38.149	0.015	2.11659	0.00029	0.866255	0.00013
PDLW1-Oil		18.0204	0.0081	15.6111	0.0075	38.14	0.018	2.11649	0.00027	0.866302	0.00012
PDLW1-Oil		18.0238	0.0026	15.6129	0.0022	38.1487	0.0054	2.11657	0.00013	0.866238	5.8e-05
PDLW1-Oil		18.0245	0.0032	15.6123	0.0025	38.1472	0.0064	2.11641	0.00012	0.866171	5.5e-05
PDLW1-Oil		18.0237	0.0032	15.6127	0.0025	38.1478	0.0063	2.11654	0.00015	0.866232	7.8e-05
PDLW1-Oil		18.0256	0.0037	15.6149	0.0031	38.1534	0.0077	2.11662	0.00012	0.866262	5.2e-05
PDLW1-Oil		18.0154	0.0038	15.6043	0.0034	38.1229	0.0084	2.11613	0.00013	0.866165	7.2e-05
PDLW1-Oil		18.0186	0.0038	15.6059	0.0033	38.1265	0.0082	2.11595	0.00013	0.866099	6.7e-05
PDLW1-Oil		18.0198	0.0036	15.6079	0.003	38.1328	0.0074	2.11616	0.00013	0.866153	6.7e-05
PDLW1-Oil		18.0167	0.0035	15.6052	0.0029	38.1265	0.007	2.11618	0.00015	0.866152	7.2e-05
PDLW1-Oil		18.0203	0.0034	15.6096	0.0032	38.1352	0.0071	2.11624	0.00018	0.866223	8.7e-05
PDLW1-solution		18.0225	0.000682407	15.6124	0.000671831	38.1481	0.00175211	2.11667	3.57913e-05	0.866274	1.24318e-05
PDLW1-solution		18.0229	0.000668759	15.6131	0.000644685	38.1494	0.00167971	2.11669	3.55864e-05	0.866291	1.28093e-05
PDLW1-solution		18.0234	0.000629645	15.6137	0.000629056	38.152	0.00168523	2.11677	3.59673e-05	0.866301	1.11251e-05
PDLW1-solution		18.0236	0.000647782	15.6141	0.000603726	38.152	0.00159409	2.11676	3.92938e-05	0.866318	1.31436e-05
PDLW1-solution		18.0227	0.000681823	15.6127	0.000646765	38.149	0.00174334	2.1167	4.00145e-05	0.866283	1.26706e-05
PDLW1-solution		18.0221	0.000674201	15.6119	0.000655315	38.1464	0.00182022	2.11662	4.54567e-05	0.866267	1.28839e-05
PDLW1-solution		18.0219	0.000651701	15.6119	0.000659103	38.1465	0.00175389	2.11665	3.90523e-05	0.866277	1.15693e-05
PDLW1-solution		18.0232	0.000639124	15.6131	0.000599616	38.1503	0.00169213	2.1167	3.79434e-05	0.866277	1.20875e-05
PDLW1-solution		18.0222	0.000392821	15.613	0.000348331	38.1496	0.000914994	2.11678	1.86284e-05	0.866322	5.3452e-06
PDLW1-solution		18.0227	0.000318629	15.6135	0.000312187	38.1512	0.000900507	2.11681	2.04253e-05	0.866329	5.64183e-06
PDLW1-solution		18.0222	0.000353179	15.613	0.000353013	38.1497	0.000949957	2.11679	2.17517e-05	0.866323	6.69259e-06
PDLW1-solution		18.0215	0.314312	15.6123	0.268552	38.1474	0.667217	2.11675	0.00222406	0.86632	0.0013616
PDLW1-solution		18.0221	0.000625166	15.6121	0.000625663	38.147	0.00177334	2.11665	4.23129e-05	0.866278	1.28668e-05
PDLW1-solution		18.0223	0.000570529	15.6124	0.000511397	38.1479	0.00143338	2.11668	3.53865e-05	0.866284	1.00507e-05
PDLW1-solution		18.0228	0.000603943	15.613	0.00060141	38.1506	0.00168703	2.11677	3.97353e-05	0.866296	1.03244e-05
PDLW1-solution		18.0221	0.000720332	15.6123	0.000702082	38.1474	0.00184737	2.11668	4.35018e-05	0.86629	1.33309e-05
PDLW1-solution		18.0219	0.000626788	15.612	0.000605262	38.1461	0.00164103	2.11662	3.92621e-05	0.866281	1.21088e-05
PDLW1-solution		18.0225	0.000640741	15.613	0.000634612	38.1491	0.00171649	2.11672	3.97002e-05	0.866307	1.13529e-05
PDLW1-solution		18.0228	0.000565744	15.6132	0.00054445	38.1511	0.00157721	2.1168	3.52311e-05	0.866304	1.09035e-05
PDLW1-solution		18.0226	0.000358165	15.6136	0.000340896	38.1516	0.000902277	2.11685	2.15257e-05	0.866336	6.16798e-06
PDLW1-solution		18.0235	0.000417404	15.6143	0.000418093	38.1532	0.00111836	2.11683	2.13049e-05	0.866333	6.36258e-06
PDLW1-solution		18.0217	0.000780058	15.6128	0.000741033	38.1487	0.00198655	2.11679	4.54278e-05	0.866337	1.40264e-05
PDLW1-solution		18.0214	0.000802369	15.6115	0.000795349	38.1446	0.002067	2.1166	4.18381e-05	0.866274	1.37683e-05
PDLW1-solution		18.0221	0.000637412	15.6122	0.000611206	38.1469	0.00166403	2.11665	4.11369e-05	0.866286	1.08343e-05
PDLW1-solution		18.0223	0.000721238	15.6126	0.00066708	38.1486	0.00184365	2.11671	3.78919e-05	0.866294	1.0964e-05
PDLW1-solution		18.0223	0.000590572	15.6125	0.000578066	38.1478	0.00164464	2.11667	4.11596e-05	0.866287	1.29123e-05
PDLW1-solution		18.0222	0.000598089	15.6123	0.00053931	38.1473	0.00146446	2.11666	3.56844e-05	0.866286	1.13162e-05
PDLW1-solution		18.0234	0.000676076	15.6139	0.000666022	38.1526	0.00186401	2.11681	4.1896e-05	0.866317	1.1149e-05
PDLW1-solution		18.0222	0.00063076	15.6123	0.000634051	38.1476	0.00169955	2.11667	3.85301e-05	0.866285	1.30261e-05
PDLW1-solution		18.0222	0.000694174	15.6123	0.000660959	38.1478	0.0017724	2.11668	3.53055e-05	0.866283	1.13808e-05
PDLW1-solution		18.0234	0.000618062	15.6138	0.00061334	38.1519	0.0016685	2.11678	3.62054e-05	0.866309	1.11877e-05
PDLW1-solution		18.0205	0.000752136	15.6117	0.000738618	38.1457	0.00199306	2.11677	4.67695e-05	0.866332	1.39788e-05
PDLW1-solution		18.0222	0.000713071	15.6123	0.000703539	38.1466	0.00191176	2.11661	4.11904e-05	0.866281	1.29597e-05
PDLW1-solution		18.0223	0.000619058	15.6126	0.000615902	38.1473	0.00169485	2.11665	4.19367e-05	0.866295	1.28474e-05
PDLW1-solution		18.0227	0.000619145	15.6127	0.000601283	38.1482	0.0016319	2.11665	3.82015e-05	0.866283	1.13287e-05
PDLW1-solution		18.0218	0.000720407	15.6115	0.000727625	38.1444	0.00198592	2.11655	4.25948e-05	0.866261	1.26529e-05
PDLW1-solution		18.0225	0.000667669	15.6128	0.000627709	38.1482	0.00171685	2.11668	4.03389e-05	0.866296	1.25531e-05
PDLW1-solution		18.0221	0.000698225	15.6121	0.000707705	38.1467	0.00195084	2.11663	4.13925e-05	0.866275	1.17998e-05
PDLW1-solution		18.0225	0.000570609	15.6128	0.000513756	38.1488	0.00145739	2.1167	3.59391e-05	0.866294	1.1064e-05
PDLW1-solution		18.0224	0.000709152	15.6129	0.000689347	38.1488	0.00183848	2.11672	4.43906e-05	0.866306	1.40231e-05

## Sheet: Anonymous
		²⁰⁶Pb/²⁰⁴Pb	SE_²⁰⁶Pb/²⁰⁴Pb	²⁰⁷Pb/²⁰⁴Pb	SE_²⁰⁷Pb/²⁰⁴Pb	²⁰⁸Pb/²⁰⁴Pb	SE_²⁰⁸Pb/²⁰⁴Pb	²⁰⁸Pb/²⁰⁶Pb	SE_²⁰⁸Pb/²⁰⁶Pb	²⁰⁷Pb/²⁰⁶Pb	SE_²⁰⁷Pb/²⁰⁶Pb
Anonymous		18.3999	0.0023	15.6676	0.002	38.5173	0.005	2.09334	0.00024	0.851505	0.00011
Anonymous		18.4043	0.003	15.6654	0.0022	38.5134	0.0054	2.09263	0.00024	0.851182	9.6e-05
Anonymous		18.3978	0.0029	15.6645	0.002	38.5089	0.005	2.09313	0.00023	0.851433	0.0001
Anonymous		18.4021	0.0026	15.6628	0.0019	38.5042	0.0046	2.09238	0.00018	0.851142	8.3e-05
Anonymous		18.4019	0.003	15.6628	0.0019	38.505	0.0048	2.09245	0.00029	0.851151	0.00013
Anonymous		18.4038	0.0037	15.6602	0.0021	38.5001	0.0049	2.09196	0.00043	0.850922	0.00017
average		18.4016		15.6639		38.5081		2.09265		0.851222
2SD			0.00488208		0.00509182		0.0127177		0.00101575		0.00042664
