# Supplementary material
Source: Research Square preprint supplement (doi:10.21203/rs.3.rs-9106478/v1)
Supplement: Supplementary file 2 [file bdba07de0b0192f2e7e3c433.xlsx]

## Sheet: parameters
Grid/line	Area (µm2)	speed µm/sec	spot µm	Energy %	Energy (J)	Hz	Integration time	Ablation time sec	N (dosage)	N*Energy
	225	4	5	1	0.42	10	0.1	12	12.5	5.25
	225	2	5	1	0.42	8	0.1	25	20	8.4
	225	2	5	5	0.51	8	0.25	21	20	10.2
	225	1	5	1	0.42	7	0.5	52	35	14.7
	225	1	5	1	0.51	7	0.5	16	35	26.95
	400	1	5	10	0.77	10	0.5	70	50	38.5			speed µm/sec	Energy (J)	Hz
	225	1	5	10	0.77	10	0.5	50	50	38.5			1	0.42	7
	400	1	4	20	2.14	5	1	85	20	42.8			1	0.51	7
	400	0.7	4	20	2.14	5	1	120	28.5714	61.1429			2	0.51	8
	400	1	2	40	6.25	5	1	78	10	62.5			1	0.77	7
	400	0.7	2	40	6.25	5	1	110	14.2857	89.2857			1	2.14	7
Spot													speed µm/sec	Energy (J)	Hz
	176.715	0	15	5	0.51	2	1	113	226	115.26
	78.5398	0	10	20	2.14	2	1	111	222	475.08
	Area (µm2)	speed µm/sec	spot µm	Energy %	Energy (J)	Hz	Integration time	Ablation time sec	N (dosage)	N*Energy
PDLW2-10.2	225	2	5	5	0.51	8	0.25	21	20	10.2
PDLW2-14.7	225	1	5	1	0.42	7	0.5	52	35	14.7
			Laser ablation			Settings 1	Settings 2
			He (L min-1)			0.980 - 01.080	0.980 - 01.080
			speed µm/sec			1	2
			spot µm			5	5
			Energy (J)			0.42	0.51
			Hz			7	8
			N (dosage)			35	20
			N*Energy			10.2	14.7
			Neoma Integration time (sec)			0.5	0.25
			Ablation time sec			~ 50	~ 20
			Efficency %			0.05-0.3	0.05-0.3
			Plasma			Solution	Laser
			RF Power (W)			1200	1200
			Plasma condition			dry plasma
			Nebulizer Ar flow (L min-1)			0.8
			Sampling cone			Standard	Standard
			Skimmer cone			H	H
			Collection			Solution	Laser
			Sensitivity (V ppm-1)			320 - 400
			Blank signal 208Pb (V)			< 0.003	< 0.001
			Cycles			40	~ 80 - 100
			block			3	1
			Integration time (seconds)			4	0.25-0.5
	L4	L3	L2	L1	Center	H1	H2	H3	H4
	200Hg	202Hg	203Tl	204Pb	205Tl	206Pb	207Pb	208Pb	209Bi

## Sheet: SE + Accuracy
	Total beam	²⁰⁶Pb/²⁰⁴Pb	SE_²⁰⁶Pb/²⁰⁴Pb	²⁰⁷Pb/²⁰⁴Pb	SE_²⁰⁷Pb/²⁰⁴Pb	²⁰⁸Pb/²⁰⁴Pb	SE_²⁰⁸Pb/²⁰⁴Pb	²⁰⁸Pb/²⁰⁶Pb	SE_²⁰⁸Pb/²⁰⁶Pb	²⁰⁷Pb/²⁰⁶Pb	SE_²⁰⁷Pb/²⁰⁶Pb	Grid-a/spot-b	Grid-1/spot-0	Area (µm2)	speed µm/sec	spot µm	Energy %	Energy (J)	Hz	Integration time	Ablation time sec	N (dosage) overlapping pulse per unit of material	Te total energy per unit area delivered to a point as the beam passes	date	Bias ²⁰⁶Pb/²⁰⁴Pb	SE_²⁰⁶Pb/²⁰⁴Pb ppm	Bias ²⁰⁷Pb/²⁰⁴Pb	SE_²⁰⁷Pb/²⁰⁴Pb ppm	Bias ²⁰⁸Pb/²⁰⁴Pb	SE_²⁰⁸Pb/²⁰⁴Pb ppm	Bias ²⁰⁸Pb/²⁰⁶Pb	SE_²⁰⁸Pb/²⁰⁶Pb ppm	Bias ²⁰⁷Pb/²⁰⁶Pb	SE_²⁰⁷Pb/²⁰⁶Pb ppm
PDLW2-5.25	7.495	18.0467	0.0048	15.6171	0.0041	38.176	0.01	2.1154	0.0003	0.865372	0.00015	a	1	225	4	5	1	0.42	10	0.1	12	12.5	5.25	2026-11-10	119.122	265.977	49.588	262.533	54.8266	261.945	-51.3157	141.817	-70.9934	173.336
PDLW2-5.25	7.424	18.0431	0.0051	15.6143	0.0046	38.17	0.011	2.11549	0.00029	0.865389	0.00015	a	1	225	4	5	1	0.42	10	0.1	12	12.5	5.25	2026-11-10	-80.3766	282.657	-129.726	294.602	-102.356	288.184	-8.9912	137.084	-50.7965	173.332
PDLW2-5.25	8.048	18.042	0.0043	15.6148	0.004	38.1685	0.0098	2.11554	0.00028	0.865469	0.00013	a	1	225	4	5	1	0.42	10	0.1	12	12.5	5.25	2026-11-10	-141.35	238.333	-97.7009	256.167	-141.66	256.756	12.6771	132.354	42.1923	150.207
PDLW2-5.25	7.145	18.0491	0.0048	15.6202	0.0041	38.1823	0.01	2.11547	0.00029	0.865428	0.00015	a	1	225	4	5	1	0.42	10	0.1	12	12.5	5.25	2026-11-10	252.077	265.941	248.039	262.481	219.815	261.901	-19.2825	137.085	-5.48965	173.325
PDLW2-5.25	7.428	18.0429	0.0049	15.6154	0.004	38.1709	0.0092	2.11556	0.00027	0.86546	0.00014	a	1	225	4	5	1	0.42	10	0.1	12	12.5	5.25	2026-11-10	-91.4622	271.575	-59.2735	256.157	-78.7757	241.021	25.6716	127.626	30.7347	161.764
PDLW2-5.25	7.05	18.0425	0.0051	15.6165	0.0041	38.172	0.01	2.11567	0.00028	0.86554	0.00015	a	1	225	4	5	1	0.42	10	0.1	12	12.5	5.25	2026-11-10	-113.634	282.666	11.169	262.543	-49.9565	261.972	76.656	132.346	123.338	173.302
PDLW2-5.25	6.898	18.0466	0.0053	15.6187	0.0048	38.178	0.011	2.11552	0.00026	0.865465	0.00015	a	1	225	4	5	1	0.42	10	0.1	12	12.5	5.25	2026-11-10	113.581	293.684	152.024	307.324	107.21	288.124	6.61438	122.901	36.9962	173.317
PDLW2-5.25	6.91	18.0478	0.0053	15.62	0.005	38.183	0.011	2.11566	0.00028	0.865479	0.00015	a	1	225	4	5	1	0.42	10	0.1	12	12.5	5.25	2026-11-10	180.064	293.665	235.238	320.102	238.144	288.086	71.0765	132.346	53.7332	173.314
PDLW2-8.4	12.34	18.0461	0.0026	15.618	0.0022	38.1781	0.0053	2.11559	0.00014	0.86545	7.4e-05	a	1	225	2	5	1	0.42	8	0.1	25	20	8.4	2026-11-10	85.8777	144.075	107.211	140.863	109.829	138.823	36.9395	66.1755	19.8841	85.5046
PDLW2-8.4	11.74	18.0446	0.0027	15.6179	0.0023	38.1778	0.0054	2.11575	0.00016	0.865517	8e-05	a	1	225	2	5	1	0.42	8	0.1	25	20	8.4	2026-11-10	2.75745	149.629	100.809	147.267	101.972	141.443	112.2	75.6234	96.6006	92.4304
PDLW2-8.4	10.95	18.0473	0.0027	15.6202	0.0023	38.1829	0.0055	2.11571	0.00015	0.865515	7.7e-05	a	1	225	2	5	1	0.42	8	0.1	25	20	8.4	2026-11-10	152.364	149.607	248.039	147.245	235.526	144.044	96.16	70.8981	94.2389	88.9644
PDLW2-8.4	10.98	18.0519	0.0028	15.6228	0.0022	38.1894	0.0054	2.11553	0.00016	0.865438	7.8e-05	a	1	225	2	5	1	0.42	8	0.1	25	20	8.4	2026-11-10	407.146	155.108	414.421	140.82	405.69	141.4	11.53	75.631	5.82727	90.1278
PDLW2-8.4	10.42	18.0438	0.003	15.6152	0.0025	38.1716	0.006	2.1155	0.00015	0.865405	7.7e-05	a	1	225	2	5	1	0.42	8	0.1	25	20	8.4	2026-11-10	-41.579	166.262	-72.0823	160.1	-60.436	157.185	-5.86956	70.9053	-31.9532	88.9757
PDLW2-8.4	10.25	18.0442	0.0027	15.6176	0.0023	38.178	0.0056	2.1158	0.00014	0.865519	7.1e-05	a	1	225	2	5	1	0.42	8	0.1	25	20	8.4	2026-11-10	-19.4103	149.633	81.6016	147.27	107.21	146.681	139.603	66.1687	99.559	82.0317
PDLW2-8.4	10	18.0486	0.0028	15.6216	0.0024	38.1873	0.0056	2.1158	0.00015	0.86553	7.9e-05	a	1	225	2	5	1	0.42	8	0.1	25	20	8.4	2026-11-10	224.381	155.137	337.636	153.633	350.72	146.646	139.353	70.895	111.83	91.2736
PDLW2-8.4	9.663	18.0457	0.0028	15.6187	0.0023	38.1793	0.0056	2.1157	0.00016	0.865508	7.7e-05	a	1	225	2	5	1	0.42	8	0.1	25	20	8.4	2026-11-10	63.7136	155.162	152.024	147.259	141.256	146.676	90.5329	75.6251	86.8653	88.9651
PDLW2-8.4	11.71	18.0428	0.0028	15.6145	0.0027	38.1678	0.0061	2.1154	0.00018	0.865414	8.9e-05	a	1	225	2	5	1	0.42	8	0.1	20	20	8.4	2026-01-14	-97.0051	155.187	-116.916	172.916	-160.002	159.821	-50.004	85.0902	-21.3598	102.841
PDLW2-8.4	11.76	18.0416	0.0025	15.6147	0.0025	38.168	0.0055	2.11556	0.00019	0.865483	9.3e-05	a	1	225	2	5	1	0.42	8	0.1	20	20	8.4	2026-01-14	-163.524	138.569	-104.106	160.106	-154.762	144.1	21.7478	89.8109	57.9581	107.454
PDLW2-8.4	11.43	18.0443	0.003	15.6145	0.0029	38.1672	0.0068	2.11519	0.00021	0.865343	9.5e-05	a	1	225	2	5	1	0.42	8	0.1	20	20	8.4	2026-01-14	-13.8683	166.257	-116.916	185.725	-175.725	178.163	-148.866	99.2817	-104.497	109.783
PDLW2-8.4	11.31	18.0429	0.003	15.6147	0.0025	38.1692	0.0061	2.11547	0.00021	0.865421	0.00011	a	1	225	2	5	1	0.42	8	0.1	20	20	8.4	2026-01-14	-91.4622	166.27	-104.106	160.106	-123.318	159.815	-18.8658	99.2688	-14.0935	127.106
PDLW2-10.2	20.25	18.0455	0.0025	15.6166	0.0021	38.1738	0.0048	2.11542	0.00022	0.865401	0.00011	a	1	225	2	5	5	0.51	8	0.25	20	20	10.2	2026-01-15	52.6312	138.539	17.5724	134.472	-2.8014	125.741	-42.4484	103.998	-36.5118	127.109
PDLW2-10.2	20.86	18.0436	0.0022	15.6149	0.0023	38.1691	0.0052	2.11538	0.00022	0.865398	0.00011	a	1	225	2	5	5	0.51	8	0.25	20	20	10.2	2026-01-15	-52.6637	121.927	-91.2961	147.295	-125.938	136.236	-60.283	104	-40.0815	127.109
PDLW2-10.2	21.4	18.0436	0.0021	15.616	0.0019	38.1734	0.0042	2.11562	0.00023	0.865459	0.00011	a	1	225	2	5	5	0.51	8	0.25	20	20	10.2	2026-01-15	-52.6637	116.385	-20.8491	121.67	-13.2799	110.024	52.3677	108.715	30.3619	127.1
PDLW2-10.2	21.54	18.0452	0.0025	15.617	0.0022	38.1764	0.0048	2.1156	0.00021	0.865438	0.00011	a	1	225	2	5	5	0.51	8	0.25	20	20	10.2	2026-01-15	36.0072	138.541	43.185	140.872	65.3037	125.732	42.2836	99.2627	5.72703	127.103
PDLW2-10.2	21.6	18.0474	0.0023	15.6182	0.0021	38.1789	0.0047	2.11548	0.00021	0.865399	0.00011	a	1	225	2	5	5	0.51	8	0.25	20	20	10.2	2026-01-15	157.904	127.442	120.015	134.459	130.781	123.105	-14.1409	99.2683	-39.346	127.109
PDLW2-10.2	21.3	18.046	0.0023	15.6164	0.0017	38.1736	0.004	2.11535	0.00024	0.865366	0.00012	a	1	225	2	5	5	0.51	8	0.25	20	20	10.2	2026-01-15	80.3368	127.452	4.76553	108.86	-8.04064	104.784	-75.3969	113.456	-77.0285	138.67
PDLW2-10.2	22.38	18.0453	0.002	15.6156	0.0018	38.1703	0.0046	2.11525	0.00019	0.865356	9.2e-05	a	1	225	2	5	5	0.51	8	0.25	20	20	10.2	2026-01-15	41.5486	110.832	-46.465	115.269	-94.496	120.513	-123.062	89.8239	-89.4685	106.315
PDLW2-10.2	22	18.0451	0.0026	15.618	0.0019	38.1785	0.0046	2.11573	0.00023	0.865498	0.00012	a	1	225	2	5	5	0.51	8	0.25	20	20	10.2	2026-01-15	30.4657	144.083	107.211	121.655	120.305	120.487	102.827	108.71	75.2966	138.648
PDLW2-10.2	20.85	18.0447	0.0023	15.6163	0.0019	38.1736	0.0047	2.1155	0.00018	0.865423	9.2e-05	a	1	225	2	5	5	0.51	8	0.25	20	20	10.2	2026-01-20	8.29923	127.461	-1.638	121.668	-8.04064	123.122	-3.35333	85.0862	-11.3884	106.306
PDLW2-10.2	21.22	18.0461	0.0023	15.6176	0.0021	38.1792	0.0049	2.11565	0.00018	0.865428	0.0001	a	1	225	2	5	5	0.51	8	0.25	20	20	10.2	2026-01-20	85.8777	127.451	81.6016	134.464	138.637	128.342	65.7499	85.0803	-5.72756	115.55
PDLW2-10.2	21.43	18.0433	0.002	15.6152	0.0016	38.1727	0.0038	2.11562	0.00018	0.865429	9.3e-05	a	1	225	2	5	5	0.51	8	0.25	20	20	10.2	2026-01-20	-69.2913	110.844	-72.0823	102.464	-31.6179	99.5476	50.6567	85.0816	-4.24192	107.461
PDLW2-10.2	21.95	18.0464	0.0024	15.6179	0.002	38.177	0.0049	2.11549	0.00021	0.86543	0.0001	a	1	225	2	5	5	0.51	8	0.25	20	20	10.2	2026-01-20	102.5	132.991	100.809	128.058	81.0189	128.35	-8.49659	99.2677	-3.14258	115.549
PDLW2-10.2	15.79	18.0466	0.0027	15.6181	0.0023	38.1802	0.0053	2.11565	0.00019	0.865432	9.5e-05	a	1	225	2	5	5	0.51	8	0.25	21	20	10.2	2026-01-21	113.581	149.613	113.613	147.265	164.825	138.815	64.2355	89.8071	-1.41932	109.772
PDLW2-10.2	15.33	18.0434	0.0028	15.6161	0.0025	38.1741	0.0057	2.11568	0.00019	0.865474	8.7e-05	a	1	225	2	5	5	0.51	8	0.25	21	20	10.2	2026-01-21	-63.7487	155.181	-14.4453	160.091	5.05735	149.316	81.7872	89.8055	47.8492	100.523
PDLW2-10.2	15.07	18.0492	0.0025	15.6211	0.0023	38.1874	0.0053	2.11574	0.00019	0.865473	9.1e-05	a	1	225	2	5	5	0.51	8	0.25	21	20	10.2	2026-01-21	257.616	138.51	305.639	147.237	353.338	138.789	108.732	89.8031	46.5849	105.145
PDLW2-10.2	14.72	18.0441	0.0027	15.6165	0.0025	38.1757	0.0058	2.11569	0.00021	0.865463	0.0001	a	1	225	2	5	5	0.51	8	0.25	21	20	10.2	2026-01-21	-24.9524	149.633	11.169	160.087	46.9686	151.929	84.9047	99.2585	34.6694	115.545
PDLW2-14.7	14.21	18.0467	0.0017	15.6185	0.0015	38.1805	0.0036	2.11565	9.2e-05	0.865449	4.8e-05	a	1	225	1	5	1	0.42	7	0.5	52	35	14.7	2026-11-06	119.122	94.2	139.221	96.04	172.681	94.289	66.5516	43.4855	18.6503	55.4625
PDLW2-14.7	14.33	18.0456	0.0019	15.6174	0.0016	38.177	0.0037	2.11558	9.8e-05	0.865441	4.7e-05	a	1	225	1	5	1	0.42	7	0.5	52	35	14.7	2026-11-06	58.1725	105.289	68.7964	102.45	81.0189	96.917	35.834	46.3229	9.17347	54.3076
PDLW2-14.7	14.04	18.0457	0.0018	15.6179	0.0015	38.179	0.0037	2.11568	0.0001	0.865464	5e-05	a	1	225	1	5	1	0.42	7	0.5	52	35	14.7	2026-11-06	63.7136	99.7468	100.809	96.0436	133.4	96.9119	82.6759	47.266	35.6464	57.7725
PDLW2-14.7	13.77	18.0446	0.0018	15.616	0.0015	38.1745	0.0036	2.11556	8.8e-05	0.865411	4.5e-05	a	1	225	1	5	1	0.42	7	0.5	52	35	14.7	2026-11-06	2.75745	99.7528	-20.8491	96.0553	15.5355	94.3038	25.7644	41.5965	-25.0577	51.9984
PDLW2-14.7	13.62	18.0455	0.0019	15.6177	0.0016	38.1782	0.0039	2.11566	9.5e-05	0.865462	4.9e-05	a	1	225	1	5	1	0.42	7	0.5	52	35	14.7	2026-11-06	52.6312	105.289	88.004	102.448	112.448	102.153	72.8055	44.9032	33.9236	56.6171
PDLW2-14.7	13.8	18.0464	0.0018	15.6185	0.0015	38.1808	0.0035	2.1157	8.7e-05	0.865463	4.4e-05	a	1	225	1	5	1	0.42	7	0.5	52	35	14.7	2026-11-06	102.5	99.7429	139.221	96.04	180.537	91.6691	91.0307	41.1211	35.2735	50.8398
PDLW2-14.7	8.64	18.046	0.0024	15.617	0.0023	38.1737	0.0055	2.11536	9.9e-05	0.8654	4.4e-05	a	1	225	1	5	1	0.42	7	0.5	49	35	14.7	2026-01-14	80.3368	132.993	43.185	147.275	-5.42102	144.078	-72.7771	46.8007	-38.6058	50.8436
PDLW2-14.7	8.87	18.0429	0.0024	15.6146	0.0021	38.1682	0.0052	2.11541	0.0001	0.865415	4.5e-05	a	1	225	1	5	1	0.42	7	0.5	49	35	14.7	2026-01-14	-91.4622	133.016	-110.511	134.49	-149.521	136.239	-45.0661	47.2721	-20.4978	51.9982
PDLW2-14.7	8.78	18.0428	0.0025	15.614	0.0021	38.1684	0.0049	2.11544	9.9e-05	0.865387	4.9e-05	a	1	225	1	5	1	0.42	7	0.5	49	35	14.7	2026-01-14	-97.0051	138.559	-148.942	134.495	-144.28	128.378	-34.2834	46.7988	-53.383	56.6221
PDLW2-14.7	8.86	18.0432	0.0026	15.6137	0.0022	38.1666	0.0055	2.11529	9.7e-05	0.865351	4.7e-05	a	1	225	1	5	1	0.42	7	0.5	49	35	14.7	2026-01-14	-74.8339	144.099	-168.159	140.902	-191.449	144.105	-103.618	45.8566	-94.769	54.3132
PDLW2-14.7	11.79	18.0441	0.0022	15.6146	0.002	38.1687	0.0047	2.1153	0.00014	0.865358	7e-05	a	1	225	1	5	1	0.42	7	0.5	49	35	14.7	2026-01-15	-24.9524	121.924	-110.511	128.085	-136.419	123.138	-98.4761	66.1844	-87.0073	80.8914
PDLW2-14.7	13.6	18.0449	0.002	15.6161	0.0018	38.1732	0.0042	2.11546	0.00011	0.865402	6.1e-05	a	1	225	1	5	1	0.42	7	0.5	49	35	14.7	2026-01-15	19.3826	110.835	-14.4453	115.266	-18.5193	110.025	-24.9157	51.9982	-35.2797	70.4874
PDLW2-14.7	13.45	18.0427	0.0021	15.6145	0.0017	38.1695	0.0039	2.11551	0.00013	0.865419	6.5e-05	a	1	225	1	5	1	0.42	7	0.5	49	35	14.7	2026-01-15	-102.548	116.391	-116.916	108.873	-115.457	102.176	0.0788475	61.4509	-15.8173	75.1081
PDLW2-14.7	13.53	18.0441	0.002	15.6158	0.0017	38.1718	0.0042	2.11547	0.00013	0.865424	6.1e-05	a	1	225	1	5	1	0.42	7	0.5	49	35	14.7	2026-01-15	-24.9524	110.84	-33.6569	108.864	-55.1963	110.029	-17.2563	61.452	-10.1554	70.4857
PDLW2-14.7	13.25	18.0458	0.0019	15.6171	0.0016	38.1748	0.004	2.11544	0.00014	0.865415	7.4e-05	a	1	225	1	5	1	0.42	7	0.5	46	35	14.7	2026-01-20	69.2547	105.288	49.588	102.452	23.394	104.781	-32.8769	66.1801	-21.1192	85.5081
PDLW2-14.7	13.09	18.0462	0.0023	15.6174	0.0022	38.1771	0.0051	2.11552	0.00016	0.865412	8e-05	a	1	225	1	5	1	0.42	7	0.5	46	35	14.7	2026-01-20	91.4185	127.451	68.7964	140.869	83.6381	133.588	5.20541	75.6315	-24.0753	92.4415
PDLW2-14.7	13.32	18.0421	0.0022	15.6154	0.0021	38.1731	0.0049	2.11578	0.00021	0.865498	0.0001	a	1	225	1	5	1	0.42	7	0.5	46	35	14.7	2026-01-20	-135.807	121.937	-59.2735	134.483	-21.139	128.363	127.637	99.2542	75.0721	115.54
PDLW2-14.7	11.43	18.0447	0.0022	15.6155	0.0018	38.1684	0.0045	2.11521	0.00016	0.865379	7.4e-05	a	1	225	1	5	1	0.42	7	0.5	46	35	14.7	2026-01-20	8.29923	121.919	-52.8692	115.27	-144.28	117.899	-139.592	75.6425	-62.6201	85.5117
PDLW2-14.7	14.78	18.0464	0.002	15.6179	0.0021	38.1788	0.0049	2.11559	0.00014	0.86543	7.1e-05	a	1	225	1	5	1	0.42	7	0.5	47	35	14.7	2026-01-21	102.5	110.825	100.809	134.461	128.162	128.343	38.6504	66.1754	-3.14258	82.0401
PDLW2-14.7	13.95	18.0469	0.002	15.6178	0.0017	38.1788	0.0043	2.11553	0.00012	0.865401	6.2e-05	a	1	225	1	5	1	0.42	7	0.5	47	35	14.7	2026-01-21	130.203	110.822	94.4064	108.85	128.162	112.628	10.9451	56.7233	-37.2522	71.6431
PDLW2-14.7	12.75	18.0452	0.0022	15.6168	0.0018	38.1756	0.0044	2.11555	0.00013	0.865427	6.4e-05	a	1	225	1	5	1	0.42	7	0.5	47	35	14.7	2026-01-21	36.0072	121.916	30.3789	115.26	44.3493	115.257	21.3287	61.4496	-7.07962	73.9519
PDLW2-14.7	11.05	18.0452	0.0021	15.6169	0.002	38.1763	0.0047	2.11559	0.00011	0.865432	5.6e-05	a	1	225	1	5	1	0.42	7	0.5	47	35	14.7	2026-01-21	36.0072	116.374	36.782	128.066	62.6844	123.113	39.6643	51.9949	-0.676256	64.7075
PDLW2-14.7	10.96	18.044	0.0023	15.6157	0.002	38.1729	0.0049	2.11555	0.00014	0.865423	6.7e-05	a	1	225	1	5	1	0.42	7	0.5	47	35	14.7	2026-01-27	-30.4945	127.466	-40.0609	128.076	-26.3784	128.363	17.1024	66.1768	-11.0172	77.4188
PDLW2-14.7	12.05	18.0455	0.0022	15.616	0.0019	38.1759	0.0044	2.11554	0.00015	0.865368	7.9e-05	a	1	225	1	5	1	0.42	7	0.5	47	35	14.7	2026-01-27	52.6312	121.914	-20.8491	121.67	52.2073	115.256	12.5625	70.904	-74.9354	91.2906
PDLW2-14.7	12.27	18.0454	0.0019	15.6168	0.0018	38.1775	0.004	2.11564	0.00015	0.865417	6.9e-05	a	1	225	1	5	1	0.42	7	0.5	47	35	14.7	2026-01-27	47.09	105.29	30.3789	115.26	94.1146	104.774	60.0127	70.9007	-18.163	79.7303
PDLW2-14.7	12.4	18.0486	0.0024	15.6201	0.0019	38.1867	0.0045	2.11577	0.00018	0.865447	8.8e-05	a	1	225	1	5	1	0.42	7	0.5	47	35	14.7	2026-01-27	224.381	132.974	241.639	121.638	335.013	117.842	123.643	85.0754	15.8108	101.682
PDLW2-14.7	8.37	18.0445	0.0032	15.6155	0.0026	38.1712	0.0064	2.11539	0.00015	0.865388	8.2e-05	a	1	225	1	5	1	0.42	7	0.5	46	35	14.7	2026-02-05	-2.78439	177.339	-52.8692	166.501	-70.9158	167.666	-55.1438	70.9088	-51.5358	94.7551
PDLW2-14.7	6.7	18.0436	0.0031	15.6146	0.0028	38.1699	0.0063	2.11543	0.00018	0.865382	9.6e-05	a	1	225	1	5	1	0.42	7	0.5	46	35	14.7	2026-02-05	-52.6637	171.806	-110.511	179.319	-104.976	165.052	-39.3228	85.0892	-59.295	110.934

## Sheet: SE + Accuracy (2)
	Total beam	²⁰⁶Pb/²⁰⁴Pb	SE_²⁰⁶Pb/²⁰⁴Pb	²⁰⁷Pb/²⁰⁴Pb	SE_²⁰⁷Pb/²⁰⁴Pb	²⁰⁸Pb/²⁰⁴Pb	SE_²⁰⁸Pb/²⁰⁴Pb	²⁰⁸Pb/²⁰⁶Pb	SE_²⁰⁸Pb/²⁰⁶Pb	²⁰⁷Pb/²⁰⁶Pb	SE_²⁰⁷Pb/²⁰⁶Pb	Grid-a/spot-b	Grid-1/spot-0	Area (µm2)	speed µm/sec	spot µm	Energy %	Energy (J)	Hz	Integration time	Ablation time sec	N (dosage) overlapping pulse per unit of material	Te total energy per unit area delivered to a point as the beam passes	date	Bias ²⁰⁶Pb/²⁰⁴Pb	SE_²⁰⁶Pb/²⁰⁴Pb ppm	Bias ²⁰⁷Pb/²⁰⁴Pb	SE_²⁰⁷Pb/²⁰⁴Pb ppm	Bias ²⁰⁸Pb/²⁰⁴Pb	SE_²⁰⁸Pb/²⁰⁴Pb ppm	Bias ²⁰⁸Pb/²⁰⁶Pb	SE_²⁰⁸Pb/²⁰⁶Pb ppm	Bias ²⁰⁷Pb/²⁰⁶Pb	SE_²⁰⁷Pb/²⁰⁶Pb ppm
PDLW2-17.85	16.52	18.0444	0.0021	15.6159	0.0018	38.1708	0.004	2.11538	0.00017	0.865415	9.1e-05	a	1	225	1	5	1	0.51	7	0.5	16	35	17.85	2026-02-12	-8.32629	116.38	-27.253	115.267	-81.3957	104.792	-60.0814	80.3637	-20.3776	105.152
PDLW2-17.85	16.29	18.0431	0.0021	15.6158	0.0019	38.1713	0.0043	2.11556	0.00016	0.865472	7.7e-05	a	1	225	1	5	1	0.51	7	0.5	16	35	17.85	2026-02-12	-80.3766	116.388	-33.6569	121.672	-68.2958	112.65	25.0661	75.63	45.2649	88.9688
PDLW2-17.85	15.01	18.043	0.0022	15.6154	0.002	38.1693	0.0043	2.11546	0.00017	0.865455	8.2e-05	a	1	225	1	5	1	0.51	7	0.5	16	35	17.85	2026-02-12	-85.9194	121.931	-59.2735	128.079	-120.698	112.656	-21.7883	80.3607	25.1925	94.7479
PDLW2-17.85	13.85	18.0417	0.0023	15.6131	0.0022	38.1632	0.0052	2.11528	0.00021	0.86539	0.0001	a	1	225	1	5	1	0.51	7	0.5	16	35	17.85	2026-02-12	-157.981	127.482	-206.594	140.907	-280.557	136.257	-109.568	99.2778	-50.057	115.555
PDLW2-17.85	14.49	18.0446	0.0022	15.6166	0.002	38.1743	0.0041	2.11555	0.00017	0.865445	9.2e-05	a	1	225	1	5	1	0.51	7	0.5	16	35	17.85	2026-02-12	2.75745	121.92	17.5724	128.069	10.2964	107.402	20.5254	80.3573	13.3639	106.304
PDLW2-17.85	12.12	18.0386	0.0021	15.6092	0.002	38.1532	0.0046	2.11509	0.00018	0.865322	8.8e-05	a	1	225	1	5	1	0.51	7	0.5	16	35	17.85	2026-02-12	-329.862	116.417	-456.499	128.13	-542.731	120.567	-199.81	85.1029	-128.047	101.696
PDLW2-17.85	11.1	18.0429	0.0029	15.6113	0.0026	38.1607	0.006	2.115	0.00027	0.865232	0.00013	a	1	225	1	5	1	0.51	7	0.5	16	35	17.85	2026-02-12	-91.4622	160.728	-321.919	166.546	-346.087	157.23	-241.612	127.66	-231.887	150.249
PDLW2-17.85	12.4	18.0466	0.0023	15.6169	0.0022	38.1758	0.005	2.1154	0.00025	0.865365	0.00012	a	1	225	1	5	1	0.51	7	0.5	16	35	17.85	2026-02-12	113.581	127.448	36.782	140.873	49.588	130.973	-51.0134	118.181	-78.2593	138.67
PDLW2-17.85	13.01	18.0434	0.0021	15.6149	0.0019	38.1705	0.0046	2.11548	0.00012	0.865408	5.5e-05	a	1	225	1	5	1	0.51	7	0.5	16	35	17.85	2026-02-12	-63.7487	116.386	-91.2961	121.679	-89.2558	120.512	-12.5187	56.7246	-28.9968	63.5538
PDLW2-17.85	12.75	18.0453	0.0019	15.617	0.0017	38.1751	0.0042	2.11551	0.00012	0.865433	5.7e-05	a	1	225	1	5	1	0.51	7	0.5	16	35	17.85	2026-02-12	41.5486	105.291	43.185	108.856	31.2523	110.019	2.68986	56.7238	0.185418	65.863
PDLW2-17.85	12.36	18.0442	0.0018	15.6175	0.0017	38.1779	0.0042	2.1158	0.00012	0.865514	5.7e-05	a	1	225	1	5	1	0.51	7	0.5	16	35	17.85	2026-02-12	-19.4103	99.755	75.199	108.852	104.591	110.011	136.984	56.7162	93.1565	65.8569
PDLW2-17.85	12.42	18.0471	0.0023	15.6175	0.0019	38.1796	0.0047	2.11555	0.00011	0.865374	5.3e-05	a	1	225	1	5	1	0.51	7	0.5	16	35	17.85	2026-02-12	141.283	127.444	75.199	121.658	149.113	123.102	20.8166	51.9959	-67.545	61.2452
PDLW2-17.85	7.32	18.0452	0.0032	15.6185	0.0027	38.182	0.0067	2.11591	0.00014	0.865521	6.6e-05	a	1	225	1	5	1	0.51	7	0.5	16	35	17.85	2026-02-12	36.0072	177.332	139.221	172.872	211.96	175.475	188.943	66.1654	101.766	76.2546
PDLW2-38.5	24.91	18.0409	0.0022	15.6118	0.0021	38.159	0.0052	2.11514	0.00031	0.865356	0.00015	a	1	400	1	5	10	0.77	10	0.5	70	50	38.5	2025-09-29	-202.332	121.945	-289.882	134.514	-390.653	136.272	-175.295	146.563	-88.9839	173.339
PDLW2-38.5	20.37	18.0415	0.0018	15.6133	0.0018	38.1648	0.0045	2.11539	0.00026	0.86541	0.00012	a	1	400	1	5	10	0.77	10	0.5	70	50	38.5	2025-09-29	-169.068	99.77	-193.782	115.286	-238.621	117.91	-56.5542	122.909	-26.161	138.663
PDLW2-38.5	18.19	18.0419	0.0022	15.613	0.0021	38.1654	0.0053	2.11538	0.00026	0.865374	0.00012	a	1	400	1	5	10	0.77	10	0.5	70	50	38.5	2025-09-29	-146.894	121.938	-213.001	134.503	-222.897	138.869	-63.0043	122.91	-67.5483	138.668
PDLW2-38.5	20.56	18.0453	0.002	15.6164	0.0021	38.1764	0.0052	2.11559	0.00028	0.8654	0.00013	a	1	400	1	5	10	0.77	10	0.5	70	50	38.5	2025-09-29	41.5486	110.832	4.76553	134.474	65.3037	136.21	36.7422	132.351	-38.2357	150.22
PDLW2-39	19.6	18.0438	0.0021	15.6154	0.002	38.1737	0.0049	2.11561	0.00017	0.865416	8.2e-05	a	1	225	1	5	10	0.78	10	0.5	50	50	39	2025-09-29	-41.579	116.383	-59.2735	128.079	-5.42102	128.361	49.1425	80.355	-19.1449	94.7521
PDLW2-39	18.52	18.0434	0.0022	15.6153	0.0023	38.1652	0.0056	2.11519	0.00026	0.86543	0.00012	a	1	225	1	5	10	0.78	10	0.5	50	50	39	2025-09-29	-63.7487	121.928	-65.6779	147.291	-228.138	146.731	-151.39	122.92	-3.38013	138.659
PDLW2-39	19.3	18.0423	0.0021	15.6143	0.0021	38.166	0.0047	2.11536	0.00025	0.865427	0.00012	a	1	225	1	5	10	0.78	10	0.5	50	50	39	2025-09-29	-124.72	116.393	-129.726	134.492	-207.172	123.146	-69.4541	118.183	-6.45597	138.66
PDLW2-39	20.18	18.0453	0.002	15.617	0.002	38.1787	0.0048	2.11571	0.00027	0.865433	0.00012	a	1	225	1	5	10	0.78	10	0.5	50	50	39	2025-09-29	41.5486	110.832	43.185	128.066	125.543	125.725	96.983	127.616	0.185418	138.659
PDLW2-39	18.52	18.0419	0.0021	15.614	0.0019	38.1668	0.0047	2.11545	0.00025	0.86543	0.00012	a	1	225	1	5	10	0.78	10	0.5	50	50	39	2025-09-29	-146.894	116.396	-148.942	121.686	-186.207	123.144	-26.3209	118.178	-3.49893	138.659
PDLW2-39	20.41	18.0445	0.0019	15.6149	0.002	38.1691	0.0048	2.11528	0.00023	0.865355	0.00011	a	1	225	1	5	10	0.78	10	0.5	50	50	39	2025-09-29	-2.78439	105.295	-91.2961	128.083	-125.938	125.756	-110.165	108.733	-89.9627	127.115
PDLW2-39	20.45	18.0443	0.0022	15.6157	0.002	38.1721	0.0046	2.11547	0.00023	0.865409	0.00011	a	1	225	1	5	10	0.78	10	0.5	50	50	39	2025-09-29	-13.8683	121.922	-40.0609	128.076	-47.3367	120.507	-20.4811	108.723	-27.6434	127.108
PDLW2-39	20.81	18.04	0.0022	15.6116	0.002	38.1591	0.0046	2.11525	0.00028	0.865388	0.00014	a	1	225	1	5	10	0.78	10	0.5	50	50	39	2025-09-29	-252.231	121.951	-302.697	128.11	-388.032	120.548	-122.778	132.372	-51.9043	161.777
PDLW2-39	18.44	18.0413	0.002	15.6131	0.002	38.1636	0.0045	2.11535	0.00026	0.865409	0.00012	a	1	225	1	5	10	0.78	10	0.5	50	50	39	2025-09-29	-180.156	110.857	-206.594	128.098	-270.073	117.913	-76.913	122.911	-27.8851	138.663
PDLW2-39	19.07	18.0402	0.002	15.6111	0.0022	38.1583	0.0052	2.11518	0.00028	0.865351	0.00014	a	1	225	1	5	10	0.78	10	0.5	50	50	39	2025-09-29	-241.142	110.864	-334.735	140.925	-409.005	136.274	-154.834	132.376	-95.0219	161.784
PDLW2-39	19.74	18.0413	0.0023	15.6114	0.0024	38.1573	0.0051	2.115	0.00034	0.865315	0.00017	a	1	225	1	5	10	0.78	10	0.5	50	50	39	2025-09-29	-180.156	127.485	-315.512	153.734	-435.223	133.657	-242.032	160.757	-136.783	196.46
PDLW2-39	21.45	18.0417	0.0023	15.6125	0.0021	38.1626	0.0047	2.11524	0.00028	0.865356	0.00014	a	1	225	1	5	10	0.78	10	0.5	50	50	39	2025-09-29	-157.981	127.482	-245.033	134.508	-296.283	123.157	-125.292	132.372	-88.4897	161.783
PDLW2-42.8	18.77	18.0459	0.0018	15.6175	0.0017	38.1783	0.0041	2.11562	0.00018	0.865432	9.1e-05	a	1	400	1	4	20	2.14	5	1	85	20	42.8	2025-08-01	74.7958	99.7456	75.199	108.852	115.067	107.391	53.2601	85.0814	-1.0478	105.15
PDLW2-42.8	14.53	18.0442	0.0021	15.6155	0.0019	38.1678	0.0046	2.11524	0.00021	0.865403	0.0001	a	1	400	1	4	20	2.14	5	1	85	20	42.8	2025-08-01	-19.4103	116.381	-52.8692	121.674	-160.002	120.52	-127.601	99.2795	-34.9094	115.553
PDLW2-42.8	13.89	18.0421	0.0023	15.613	0.002	38.1612	0.0045	2.11512	0.00026	0.865365	0.00011	a	1	400	1	4	20	2.14	5	1	85	20	42.8	2025-08-01	-135.807	127.48	-213.001	128.098	-332.981	117.921	-184.158	122.924	-78.6344	127.114
PDLW2-42.8	14.95	18.0451	0.0024	15.6168	0.0023	38.1723	0.0054	2.11538	0.00028	0.865432	0.00014	a	1	400	1	4	20	2.14	5	1	85	20	42.8	2025-08-01	30.4657	133	30.3789	147.277	-42.097	141.464	-59.5776	132.364	-1.53794	161.769
PDLW2-42.8	15.73	18.0426	0.0021	15.614	0.002	38.168	0.0044	2.11544	0.00018	0.865396	8.9e-05	a	1	400	1	4	20	2.14	5	1	81	20	42.8	2025-08-04	-108.091	116.391	-148.942	128.09	-154.762	115.28	-33.6785	85.0888	-42.2976	102.843
PDLW2-42.8	14.16	18.0404	0.0054	15.6118	0.0042	38.156	0.0098	2.11503	0.00029	0.86538	0.00013	a	1	400	1	4	20	2.14	5	1	81	20	42.8	2025-08-04	-230.053	299.328	-289.882	269.027	-469.309	256.84	-226.211	137.114	-61.2667	150.223
PDLW2-42.8	15.31	18.041	0.0021	15.6124	0.002	38.1574	0.0054	2.11504	0.00022	0.865384	0.0001	a	1	400	1	4	20	2.14	5	1	81	20	42.8	2025-08-04	-196.787	116.402	-251.44	128.103	-432.601	141.519	-222.778	104.017	-56.0928	115.556
PDLW2-42.8	16.42	18.0393	0.0025	15.6099	0.0021	38.1563	0.0051	2.11518	0.0002	0.865327	0.0001	a	1	400	1	4	20	2.14	5	1	81	20	42.8	2025-08-04	-291.045	138.586	-411.635	134.53	-461.443	133.661	-157.36	94.5548	-122.006	115.563
PDLW2-42.8	22.5	18.0412	0.004	15.6131	0.0042	38.165	0.0092	2.11544	0.00034	0.865414	0.00016	a	1	400	1	4	20	2.14	5	1	78	20	42.8	2025-08-05	-185.7	221.715	-206.594	269.005	-233.38	241.059	-34.6843	160.723	-22.3421	184.883
PDLW2-42.8	15.8	18.0425	0.0031	15.6106	0.0029	38.1533	0.0061	2.11463	0.00032	0.865213	0.00016	a	1	400	1	4	20	2.14	5	1	78	20	42.8	2025-08-05	-113.634	171.817	-366.775	185.771	-540.109	159.881	-413.434	151.326	-254.564	184.926
PDLW2-42.8	21.3	18.0437	0.003	15.616	0.0024	38.1735	0.0058	2.11561	0.00015	0.865454	7.4e-05	a	1	400	1	4	20	2.14	5	1	78	20	42.8	2025-08-05	-47.1213	166.263	-20.8491	153.689	-10.6603	151.938	49.4453	70.9014	24.82	85.5042
PDLW2-42.8	21.06	18.044	0.0031	15.6156	0.0028	38.1703	0.0065	2.1154	0.00017	0.865418	8.3e-05	a	1	400	1	4	20	2.14	5	1	78	20	42.8	2025-08-05	-30.4945	171.802	-46.465	179.308	-94.496	170.289	-51.0122	80.363	-17.4211	95.9074
PDLW2-42.8	20.16	18.0409	0.0027	15.6132	0.0023	38.1642	0.0057	2.11543	0.00022	0.865434	0.00011	a	1	400	1	4	20	2.14	5	1	78	20	42.8	2025-08-05	-202.332	149.66	-200.188	147.311	-254.347	149.355	-39.0176	103.998	0.691763	127.104
PDLW2-42.8	18.64	18.042	0.0026	15.6127	0.002	38.1612	0.0051	2.11513	0.00017	0.865353	7.6e-05	a	1	400	1	4	20	2.14	5	1	78	20	42.8	2025-08-05	-141.35	144.108	-232.22	128.101	-332.981	133.644	-178.614	80.3733	-92.3079	87.8254
PDLW2-42.8	20.32	18.044	0.0029	15.613	0.0027	38.1662	0.0068	2.11517	0.00015	0.865274	8.4e-05	a	1	400	1	4	20	2.14	5	1	78	20	42.8	2025-08-05	-30.4945	160.718	-213.001	172.933	-201.931	178.168	-158.443	70.9162	-183.952	97.0791
PDLW2-42.8	19.95	18.0425	0.0027	15.6135	0.0025	38.1659	0.0058	2.11533	0.00017	0.865373	7.5e-05	a	1	400	1	4	20	2.14	5	1	78	20	42.8	2025-08-05	-113.634	149.647	-180.97	160.118	-209.793	151.968	-83.1603	80.3656	-68.7797	86.6678

## Sheet: SE + Accuracy (3)
	Total beam	²⁰⁶Pb/²⁰⁴Pb	SE_²⁰⁶Pb/²⁰⁴Pb	²⁰⁷Pb/²⁰⁴Pb	SE_²⁰⁷Pb/²⁰⁴Pb	²⁰⁸Pb/²⁰⁴Pb	SE_²⁰⁸Pb/²⁰⁴Pb	²⁰⁸Pb/²⁰⁶Pb	SE_²⁰⁸Pb/²⁰⁶Pb	²⁰⁷Pb/²⁰⁶Pb	SE_²⁰⁷Pb/²⁰⁶Pb	Grid-a/spot-b	Grid-1/spot-0	Area (µm2)	speed µm/sec	spot µm	Energy %	Energy (J)	Hz	Integration time	Ablation time sec	N (dosage) overlapping pulse per unit of material	Te total energy per unit area delivered to a point as the beam passes	date	Bias ²⁰⁶Pb/²⁰⁴Pb	SE_²⁰⁶Pb/²⁰⁴Pb ppm	Bias ²⁰⁷Pb/²⁰⁴Pb	SE_²⁰⁷Pb/²⁰⁴Pb ppm	Bias ²⁰⁸Pb/²⁰⁴Pb	SE_²⁰⁸Pb/²⁰⁴Pb ppm	Bias ²⁰⁸Pb/²⁰⁶Pb	SE_²⁰⁸Pb/²⁰⁶Pb ppm	Bias ²⁰⁷Pb/²⁰⁶Pb	SE_²⁰⁷Pb/²⁰⁶Pb ppm
PDLW2-61	13.55	18.0443	0.0029	15.6149	0.0028	38.1723	0.0062	2.11548	0.00015	0.865365	6.9e-05	a	1	400	0.7	4	20	2.14	5	1	120	28.5714	61.1429	2025-07-15	-13.8683	160.716	-91.2961	179.316	-42.097	162.421	-15.2416	70.906	-78.878	79.7352
PDLW2-61	14.56	18.0414	0.0027	15.6131	0.0026	38.1673	0.0063	2.11554	0.00016	0.865404	7.1e-05	a	1	400	0.7	4	20	2.14	5	1	120	28.5714	61.1429	2025-07-15	-174.612	149.656	-206.594	166.527	-173.105	165.063	14.4933	75.6308	-33.4281	82.0426
PDLW2-61	14.36	18.0454	0.0032	15.6167	0.0027	38.1705	0.0065	2.11525	0.00017	0.865412	7.8e-05	a	1	400	0.7	4	20	2.14	5	1	120	28.5714	61.1429	2025-07-15	47.09	177.331	23.9756	172.892	-89.2558	170.289	-123.364	80.3688	-24.5665	90.1305
PDLW2-61	15.39	18.0416	0.003	15.6138	0.0028	38.1635	0.0062	2.11531	0.00016	0.865433	7.6e-05	a	1	400	0.7	4	20	2.14	5	1	120	28.5714	61.1429	2025-07-15	-163.524	166.282	-161.753	179.329	-272.694	162.459	-96.1634	75.6392	0.320074	87.8173
PDLW2-61	15.64	18.0428	0.0025	15.615	0.0022	38.1697	0.005	2.11551	0.00014	0.865442	7.4e-05	a	1	400	0.7	4	20	2.14	5	1	120	28.5714	61.1429	2025-07-15	-97.0051	138.559	-84.8914	140.89	-110.217	130.994	-0.223773	66.1779	10.6614	85.5054
PDLW2-61	15.87	18.0426	0.0028	15.6137	0.0026	38.1672	0.0062	2.11539	0.00015	0.86538	7.9e-05	a	1	400	0.7	4	20	2.14	5	1	120	28.5714	61.1429	2025-07-15	-108.091	155.188	-168.159	166.52	-175.725	162.443	-54.6396	70.9088	-61.5123	91.2894
PDLW2-61	15.85	18.0445	0.0028	15.6141	0.0024	38.1703	0.0061	2.11534	0.00016	0.865311	7.5e-05	a	1	400	0.7	4	20	2.14	5	1	120	28.5714	61.1429	2025-07-15	-2.78439	155.172	-142.537	153.707	-94.496	159.81	-78.7237	75.6379	-141.203	86.6741
PDLW2-61	16.44	18.0397	0.0027	15.6108	0.0024	38.1609	0.0057	2.11538	0.00016	0.865358	8.1e-05	a	1	400	0.7	4	20	2.14	5	1	120	28.5714	61.1429	2025-07-15	-268.865	149.67	-353.959	153.74	-340.845	149.368	-58.973	75.6364	-86.5221	93.6029
PDLW2-61	19.39	18.0459	0.0026	15.6184	0.0024	38.181	0.0058	2.11577	0.00014	0.865482	6.7e-05	a	1	400	0.7	4	20	2.14	5	1	120	28.5714	61.1429	2025-07-18	74.7958	144.077	132.819	153.665	185.775	151.908	123.972	66.1697	56.5766	77.4135
PDLW2-61	20.68	18.0438	0.0024	15.6165	0.0025	38.1747	0.0062	2.11567	0.00015	0.865477	7.1e-05	a	1	400	0.7	4	20	2.14	5	1	120	28.5714	61.1429	2025-07-18	-41.579	133.01	11.169	160.087	20.7745	162.411	75.3365	70.8996	51.2948	82.0357
PDLW2-61	21.76	18.0455	0.0026	15.6183	0.0024	38.1809	0.0055	2.11581	0.00016	0.865496	7.1e-05	a	1	400	0.7	4	20	2.14	5	1	120	28.5714	61.1429	2025-07-18	52.6312	144.08	126.417	153.666	183.156	144.051	143.516	75.6211	72.3388	82.0339
PDLW2-61	21.8	18.0469	0.0025	15.6182	0.0024	38.1804	0.0055	2.11562	0.00016	0.865423	6.9e-05	a	1	400	0.7	4	20	2.14	5	1	120	28.5714	61.1429	2025-07-18	130.203	138.528	120.015	153.667	170.063	144.053	52.851	75.6279	-11.6401	79.7298
PDLW2-61	10.03	18.0395	0.0023	15.6101	0.0024	38.1522	0.0053	2.11493	0.00017	0.865329	8e-05	a	1	400	0.7	4	20	2.14	5	1	120	28.5714	61.1429	2025-07-22	-279.955	127.498	-398.817	153.747	-568.956	138.917	-275.931	80.3811	-120.281	92.4504
PDLW2-61	9.42	18.0411	0.0022	15.6126	0.0021	38.1575	0.0051	2.11503	0.00015	0.865391	7.5e-05	a	1	400	0.7	4	20	2.14	5	1	120	28.5714	61.1429	2025-07-22	-191.243	121.944	-238.626	134.507	-429.979	133.657	-225.701	70.9209	-48.825	86.6661
PDLW2-61	10.02	18.0434	0.0023	15.6124	0.002	38.1613	0.0049	2.11497	0.00013	0.865269	6e-05	a	1	400	0.7	4	20	2.14	5	1	120	28.5714	61.1429	2025-07-22	-63.7487	127.47	-251.44	128.103	-330.359	128.402	-253.604	61.4665	-189.131	69.3426
PDLW2-61	11.13	18.0432	0.0022	15.6134	0.002	38.1652	0.0047	2.11521	0.00012	0.865334	6.3e-05	a	1	400	0.7	4	20	2.14	5	1	120	28.5714	61.1429	2025-07-22	-74.8339	121.93	-187.376	128.095	-228.138	123.149	-140.304	56.7319	-113.985	72.8042
PDLW2-61	11.23	18.0436	0.0019	15.614	0.0019	38.1665	0.0045	2.11524	0.00013	0.865348	6.5e-05	a	1	400	0.7	4	20	2.14	5	1	120	28.5714	61.1429	2025-07-22	-52.6637	105.3	-148.942	121.686	-194.069	117.904	-128.41	61.4588	-97.7244	75.1143
PDLW2-61	10.36	18.0436	0.0023	15.6151	0.0019	38.1673	0.0046	2.11528	0.00015	0.865409	7.6e-05	a	1	400	0.7	4	20	2.14	5	1	120	28.5714	61.1429	2025-07-22	-52.6637	127.469	-78.4868	121.677	-173.105	120.522	-107.447	70.9125	-27.2729	87.8197
PDLW2-61	18.88	18.0436	0.0025	15.614	0.0023	38.1653	0.0055	2.11517	0.00017	0.865348	8.7e-05	a	1	400	0.7	4	20	2.14	5	1	130	28.5714	61.1429	2025-07-28	-52.6637	138.553	-148.942	147.304	-225.517	144.11	-159.856	80.3718	-97.7244	100.538
PDLW2-61	20.44	18.0423	0.0026	15.6131	0.0025	38.1609	0.0059	2.11508	0.00015	0.865361	7.3e-05	a	1	400	0.7	4	20	2.14	5	1	130	28.5714	61.1429	2025-07-28	-124.72	144.106	-206.594	160.122	-340.845	154.609	-203.108	70.9193	-83.315	84.3579
PDLW2-61	23.37	18.0428	0.003	15.6151	0.0026	38.1703	0.0061	2.11554	0.00017	0.865448	8.9e-05	a	1	400	0.7	4	20	2.14	5	1	130	28.5714	61.1429	2025-07-28	-97.0051	166.271	-78.4868	166.505	-94.496	159.81	15.4953	80.3577	17.0654	102.837
PDLW2-61	26.78	18.0456	0.0032	15.6165	0.0027	38.175	0.0068	2.11547	0.00016	0.865391	6.7e-05	a	1	400	0.7	4	20	2.14	5	1	130	28.5714	61.1429	2025-07-28	58.1725	177.329	11.169	172.894	28.6329	178.127	-16.5545	75.6332	-48.4573	77.4217
PDLW2-61	27.47	18.0441	0.0034	15.6148	0.0033	38.173	0.0075	2.11554	0.00014	0.865369	7.5e-05	a	1	400	0.7	4	20	2.14	5	1	130	28.5714	61.1429	2025-07-28	-24.9524	188.427	-97.7009	211.338	-23.7587	196.474	14.1801	66.177	-74.1979	86.6683
PDLW2-61	13.47	18.0429	0.0014	15.6143	0.0013	38.1675	0.0033	2.11538	0.00011	0.865399	5.4e-05	a	1	400	0.7	4	20	2.14	5	1	120	28.5714	61.1429	2025-07-29	-91.4622	77.5928	-129.726	83.257	-167.864	86.461	-63.4071	52.0002	-39.7114	62.399
PDLW2-61	14.61	18.0431	0.0016	15.6139	0.0013	38.1669	0.0032	2.11532	0.00014	0.865367	6.7e-05	a	1	400	0.7	4	20	2.14	5	1	120	28.5714	61.1429	2025-07-29	-80.3766	88.6766	-155.347	83.2591	-183.587	83.8423	-90.2141	66.1839	-76.416	77.4238
PDLW2-61	14.93	18.0412	0.0017	15.612	0.0014	38.1606	0.0033	2.11519	0.00017	0.865353	8e-05	a	1	400	0.7	4	20	2.14	5	1	120	28.5714	61.1429	2025-07-29	-185.7	94.2288	-277.068	89.6746	-348.709	86.4766	-149.99	80.371	-92.8023	92.4479
PDLW2-61	14.43	18.0419	0.002	15.6115	0.0019	38.1589	0.0041	2.11502	0.00022	0.865291	0.00011	a	1	400	0.7	4	20	2.14	5	1	120	28.5714	61.1429	2025-07-29	-146.894	110.853	-309.104	121.705	-393.275	107.445	-233.355	104.018	-163.638	127.125
PDLW2-61	17.32	18.0433	0.002	15.6154	0.0019	38.1684	0.0048	2.11538	0.00017	0.86544	7.4e-05	a	1	400	0.7	4	20	2.14	5	1	120	28.5714	61.1429	2025-07-31	-69.2913	110.844	-59.2735	121.675	-144.28	125.758	-61.9962	80.3639	8.566	85.5056
PDLW2-61	12.99	18.0413	0.0025	15.613	0.0021	38.1627	0.0053	2.1153	0.00014	0.865403	6.5e-05	a	1	400	0.7	4	20	2.14	5	1	120	28.5714	61.1429	2025-07-31	-180.156	138.571	-213.001	134.503	-293.662	138.879	-100.498	66.1846	-34.2902	75.1095
PDLW2-61	12.66	18.0428	0.0027	15.6138	0.0022	38.166	0.0054	2.1153	0.00019	0.865376	9.2e-05	a	1	400	0.7	4	20	2.14	5	1	120	28.5714	61.1429	2025-07-31	-97.0051	149.644	-161.753	140.901	-207.172	141.487	-97.1687	89.8216	-66.1929	106.312
PDLW2-61	13.03	18.0416	0.0025	15.6133	0.002	38.1626	0.0053	2.11526	0.0002	0.865406	9.4e-05	a	1	400	0.7	4	20	2.14	5	1	120	28.5714	61.1429	2025-07-31	-163.524	138.569	-193.782	128.096	-296.283	138.879	-119.749	94.5512	-31.7039	108.62
PDLW2-61	23.51	18.0432	0.0033	15.6141	0.0027	38.168	0.0061	2.11537	0.00016	0.865373	8.7e-05	a	1	400	0.7	4	20	2.14	5	1	119	28.5714	61.1429	2025-07-28	-74.8339	182.894	-142.537	172.921	-154.762	159.82	-66.9342	75.637	-69.1487	100.535
PDLW2-61	24.83	18.0432	0.0043	15.6143	0.0039	38.1651	0.0095	2.11521	0.0002	0.865384	0.00011	a	1	400	0.7	4	20	2.14	5	1	119	28.5714	61.1429	2025-07-28	-74.8339	238.317	-129.726	249.771	-230.759	248.919	-142.925	94.5534	-56.3391	127.111
PDLW2-61	25.71	18.0442	0.0035	15.6147	0.003	38.1682	0.0066	2.11526	0.00018	0.865358	8.6e-05	a	1	400	0.7	4	20	2.14	5	1	119	28.5714	61.1429	2025-07-28	-19.4103	193.968	-104.106	192.127	-149.521	172.919	-117.12	85.0959	-86.145	99.3808
PDLW2-61	25.99	18.0467	0.0042	15.618	0.0034	38.1792	0.0083	2.11558	0.00019	0.865421	0.00011	a	1	400	0.7	4	20	2.14	5	1	119	28.5714	61.1429	2025-07-28	119.122	232.73	107.211	217.698	138.637	217.396	32.5039	89.81	-13.3635	127.106
PDLW2-62.5	10.74	18.0439	0.0042	15.6139	0.0034	38.1657	0.0086	2.11516	0.00036	0.865328	0.00019	a	1	400	1	2	40	6.25	5	1	78	10	62.5	2025-08-01	-36.0367	232.766	-155.347	217.755	-215.034	225.333	-166.002	170.2	-120.758	219.57
PDLW2-62.5	10.67	18.0426	0.0031	15.6124	0.0026	38.1658	0.0064	2.11532	0.00022	0.865308	0.00011	a	1	400	1	2	40	6.25	5	1	78	10	62.5	2025-08-01	-108.091	171.816	-251.44	166.534	-212.414	167.689	-91.3236	104.003	-144.785	127.122
PDLW2-62.5	9.84	18.0421	0.0049	15.6124	0.0038	38.1615	0.0095	2.11514	0.00034	0.865332	0.00014	a	1	400	1	2	40	6.25	5	1	78	10	62.5	2025-08-01	-135.807	271.587	-251.44	243.396	-325.117	248.942	-176.295	160.746	-117.068	161.788
PDLW2-62.5	9.01	18.0413	0.0032	15.6122	0.003	38.1612	0.0071	2.11521	0.00023	0.865359	0.00012	a	1	400	1	2	40	6.25	5	1	78	10	62.5	2025-08-01	-180.156	177.371	-264.254	192.157	-332.981	186.053	-139.809	108.736	-85.5339	138.671
PDLW2-62.5	10.78	18.0421	0.003	15.6105	0.0025	38.1602	0.0057	2.11506	0.00019	0.865226	0.0001	a	1	400	1	2	40	6.25	5	1	78	10	62.5	2025-08-01	-135.807	166.278	-373.183	160.149	-359.195	149.37	-210.368	89.8318	-238.796	115.577
PDLW2-62.5	9.72	18.0437	0.0028	15.6147	0.003	38.1675	0.0064	2.11528	0.00021	0.865382	0.00012	a	1	400	1	2	40	6.25	5	1	78	10	62.5	2025-08-01	-47.1213	155.179	-104.106	192.127	-167.864	167.682	-107.749	99.2776	-58.4329	138.667
PDLW2-62.5	12.28	18.0419	0.0028	15.6141	0.0023	38.166	0.0051	2.11541	0.0002	0.865435	9e-05	a	1	400	1	2	40	6.25	5	1	79	10	62.5	2025-08-04	-146.894	155.194	-142.537	147.303	-207.172	133.627	-47.2825	94.5444	2.90556	103.994
PDLW2-62.5	11.45	18.0434	0.0033	15.6139	0.0031	38.1663	0.0072	2.11525	0.00024	0.865352	0.00013	a	1	400	1	2	40	6.25	5	1	79	10	62.5	2025-08-04	-63.7487	182.892	-155.347	198.541	-199.31	188.648	-122.565	113.462	-93.0441	150.228
PDLW2-62.5	13.26	18.045	0.0029	15.617	0.0024	38.1759	0.0056	2.11559	0.00027	0.865447	0.00012	a	1	400	1	2	40	6.25	5	1	79	10	62.5	2025-08-04	24.9242	160.709	43.185	153.679	52.2073	146.689	40.2699	127.624	16.8102	138.657
PDLW2-62.5	13.1	18.0457	0.0027	15.6159	0.0026	38.173	0.0058	2.11535	0.00022	0.865353	0.00011	a	1	400	1	2	40	6.25	5	1	79	10	62.5	2025-08-04	63.7136	149.62	-27.253	166.497	-23.7587	151.94	-74.4903	104.002	-92.4236	127.116
PDLW2-62.5	11.94	18.0426	0.0028	15.6129	0.0023	38.163	0.0056	2.11516	0.00018	0.865335	7.9e-05	a	1	400	1	2	40	6.25	5	1	82	10	62.5	2025-08-05	-108.091	155.188	-219.407	147.314	-285.799	146.739	-164.7	85.0999	-112.755	91.2941
PDLW2-62.5	13.22	18.0411	0.0024	15.6111	0.0022	38.1555	0.0058	2.11492	0.00022	0.865308	9.5e-05	a	1	400	1	2	40	6.25	5	1	82	10	62.5	2025-08-05	-191.243	133.03	-334.735	140.925	-482.419	152.01	-278.13	104.023	-144.915	109.788
PDLW2-62.5	14.07	18.0391	0.0029	15.6094	0.0029	38.1515	0.0063	2.11493	0.00022	0.865309	9.4e-05	a	1	400	1	2	40	6.25	5	1	82	10	62.5	2025-08-05	-302.135	160.762	-443.68	185.785	-587.315	165.131	-272.104	104.022	-142.954	108.632
PDLW2-62.5	14.21	18.0398	0.0029	15.6094	0.0023	38.1511	0.0061	2.11483	0.00019	0.865276	0.0001	a	1	400	1	2	40	6.25	5	1	82	10	62.5	2025-08-05	-263.32	160.756	-443.68	147.347	-597.806	159.891	-321.407	89.8418	-181.764	115.57
PDLW2-62.5	14.37	18.0386	0.0027	15.6105	0.0021	38.1555	0.005	2.11521	0.0002	0.865394	9.6e-05	a	1	400	1	2	40	6.25	5	1	82	10	62.5	2025-08-05	-329.862	149.679	-373.183	134.525	-482.419	131.043	-139.519	94.5531	-44.7586	110.932
PDLW2-62.5	13.54	18.0409	0.0022	15.6116	0.0021	38.1573	0.0049	2.11504	0.00017	0.865345	8.1e-05	a	1	400	1	2	40	6.25	5	1	82	10	62.5	2025-08-05	-202.332	121.945	-302.697	134.515	-435.223	128.416	-219.855	80.3766	-101.796	93.6043
PDLW2-89.3	8.82	18.0457	0.004	15.616	0.0029	38.1703	0.007	2.1152	0.00022	0.865359	0.00011	a	1	400	0.7	2	40	6.25	5	1	125	14.2857	89.2857	2025-07-29	63.7136	221.659	-20.8491	185.707	-94.496	183.389	-145.231	104.009	-86.0193	127.115
PDLW2-89.3	8.33	18.0418	0.0042	15.6115	0.0044	38.1565	0.0094	2.11489	0.00033	0.865296	0.00018	a	1	400	0.7	2	40	6.25	5	1	125	14.2857	89.2857	2025-07-29	-152.437	232.793	-309.104	281.844	-456.199	246.354	-290.725	156.036	-158.094	208.021
PDLW2-89.3	10.5	18.0394	0.0021	15.6115	0.0021	38.1606	0.0051	2.1154	0.00024	0.865411	0.00011	a	1	400	0.7	2	40	6.25	5	1	125	14.2857	89.2857	2025-07-29	-285.5	116.412	-309.104	134.516	-348.709	133.646	-50.2039	113.454	-25.0488	127.107
PDLW2-89.3	11.04	18.0456	0.003	15.6164	0.0025	38.1738	0.0057	2.11541	0.00018	0.865385	9.4e-05	a	1	400	0.7	2	40	6.25	5	1	110	14.2857	89.2857	2025-07-31	58.1725	166.246	4.76553	160.088	-2.8014	149.317	-47.9902	85.09	-54.8612	108.622
PDLW2-89.3	12.24	18.0427	0.0028	15.6164	0.0024	38.1682	0.0052	2.11544	0.00018	0.865525	9.4e-05	a	1	400	0.7	2	40	6.25	5	1	110	14.2857	89.2857	2025-07-31	-102.548	155.187	4.76553	153.685	-149.521	136.239	-33.9809	85.0888	105.852	108.605
PDLW2-89.3	10.16	18.0414	0.0033	15.6102	0.0027	38.1595	0.0072	2.11511	0.00023	0.865243	0.00011	a	1	400	0.7	2	40	6.25	5	1	110	14.2857	89.2857	2025-07-31	-174.612	182.913	-392.409	172.964	-377.545	188.682	-189.909	108.742	-219.21	127.132
PDLW2-89.3	11.8	18.0456	0.0037	15.6153	0.0032	38.1703	0.0069	2.11521	0.00029	0.865325	0.00015	a	1	400	0.7	2	40	6.25	5	1	110	14.2857	89.2857	2025-07-31	58.1725	205.036	-65.6779	204.927	-94.496	180.769	-139.689	137.102	-125.309	173.345
PDLW2-pigment		18.0447	0.000737927	15.6164	0.00071298	38.1739	0.00199782	2.11548	4.22676e-05	0.865428	1.28516e-05														10.7763	40.8943	5.29125	45.6558	-1.32583	52.3349	-166.002	19.9801	-120.758	14.85
PDLW2-pigment		18.0438	0.000647564	15.6153	0.000689448	38.1708	0.00182657	2.11542	4.16227e-05	0.865412	1.32823e-05														-39.5066	35.8884	-63.2975	44.152	-81.3108	47.8527	-91.3236	19.6758	-144.785	15.348
PDLW2-pigment		18.0439	0.000638882	15.6157	0.000607392	38.1728	0.00168855	2.11553	4.09964e-05	0.865434	1.06334e-05														-38.3975	35.4072	-36.9106	38.8961	-27.7931	44.2343	-176.295	19.3788	-117.068	12.2867
PDLW2-pigment		18.0443	0.000608113	15.6162	0.000595964	38.1737	0.00158691	2.11552	3.69591e-05	0.865434	1.12039e-05														-11.6474	33.7011	-10.5876	38.1633	-6.12167	41.5709	-139.809	17.4705	-85.5339	12.946
PDLW2-pigment		18.0441	0.000871764	15.6163	0.000797408	38.174	0.00215535	2.11556	4.79893e-05	0.865453	1.38278e-05														-22.4368	48.3129	1.27862	51.0624	3.19311	56.4612	-210.368	22.6839	-238.796	15.9775
PDLW2-pigment		18.0447	0.000375235	15.6172	0.00036688	38.1765	0.000988196	2.11563	2.18521e-05	0.86547	6.57278e-06														10.9969	20.7947	54.238	23.4921	68.757	25.8849	-107.749	10.3289	-58.4329	7.59446
PDLW2-pigment		18.0452	0.000737707	15.6168	0.000693331	38.175	0.00184695	2.1155	3.85295e-05	0.865433	1.24598e-05														33.3006	40.8812	32.9739	44.3964	29.9234	48.3811	-47.2825	18.2129	2.90556	14.3971
PDLW2-pigment		18.045	0.000697022	15.6165	0.000660981	38.1743	0.00175881	2.11547	3.89769e-05	0.86542	1.1547e-05														27.4863	38.6268	12.6406	42.3258	10.4328	46.0731	-122.565	18.4247	-93.0441	13.3427
PDLW2-pigment		18.0452	0.000681783	15.6168	0.000652312	38.1761	0.00188329	2.11556	4.15224e-05	0.865431	1.23607e-05														34.2201	37.782	32.3919	41.7698	56.1936	49.3316	40.2699	19.6272	16.8102	14.2827
PDLW2-pigment		18.0458	0.000720211	15.6181	0.000718557	38.1779	0.00193248	2.11559	4.40078e-05	0.86547	1.40302e-05														68.8552	39.9102	111.471	46.0081	105.313	50.6177	-74.4903	20.8017	-92.4236	16.2111
PDLW2-pigment		18.0441	0.000663597	15.6159	0.000642655	38.1727	0.00189263	2.1155	4.52648e-05	0.865431	1.23978e-05														-27.5123	36.7765	-30.1062	41.154	-31.3476	49.5808	-164.7	21.3967	-112.755	14.3256
PDLW2-pigment		18.0447	0.000782663	15.6163	0.000770323	38.1737	0.00215469	2.11547	4.43093e-05	0.865423	1.30929e-05														10.5474	43.3735	-1.51146	49.3281	-6.47322	56.4444	-278.13	20.9454	-144.915	15.1289
PDLW2-pigment		18.0442	0.000602745	15.6162	0.000573566	38.173	0.00150727	2.1155	3.72829e-05	0.865443	1.246e-05														-16.7983	33.4037	-5.59523	36.7288	-23.0348	39.4853	-272.104	17.6237	-142.954	14.3972
PDLW2-pigment		18.045	0.000615942	15.6165	0.000570429	38.1747	0.00153401	2.1155	3.43391e-05	0.865422	9.95867e-06														24.7493	34.1337	12.3085	36.5273	20.03	40.184	-321.407	16.2321	-181.764	11.5073
PDLW2-pigment		18.0447	0.000346375	15.6172	0.000366631	38.1763	0.00104416	2.11563	2.47422e-05	0.865472	6.73323e-06														8.2392	19.1954	52.9417	23.4762	63.5334	27.3511	-139.519	11.695	-44.7586	7.77984
PDLW2-pigment		18.045	0.000322907	15.6175	0.000313583	38.1774	0.000857332	2.11565	1.78307e-05	0.865481	5.17718e-06														22.5569	17.8946	77.6592	20.0789	90.3051	22.4566	-219.855	8.42798	-101.796	5.98185
PDLW2-pigment		18.0447	0.000325757	15.6174	0.000328084	38.1766	0.000907497	2.11564	2.11849e-05	0.865482	6.76759e-06														9.97347	18.0527	66.6919	21.0077	70.1542	23.771	-175.295	10.0135	-88.9839	7.81944
PDLW2-pigment		18.044	0.00071371	15.6162	0.000644902	38.1734	0.00174566	2.11554	4.03272e-05	0.865452	1.36737e-05														-30.0835	39.5539	-7.86732	41.297	-14.5024	45.7299	-56.5542	19.0624	-26.161	15.7995
PDLW2-pigment		18.0445	0.000660344	15.616	0.000646552	38.1727	0.00175398	2.11545	3.91354e-05	0.865415	1.22132e-05														-2.93621	36.5953	-23.7487	41.4033	-32.4888	45.9486	-63.0043	18.4998	-67.5483	14.1126
PDLW2-pigment		18.044	0.000683431	15.6159	0.000640418	38.1728	0.00168386	2.1155	3.52942e-05	0.865431	1.13821e-05														-28.0255	37.8757	-29.757	41.0107	-30.0547	44.1114	36.7422	16.6836	-38.2357	13.152
PDLW2-pigment		18.0449	0.000610396	15.6167	0.000607401	38.1757	0.00164514	2.11557	3.67733e-05	0.865437	1.12121e-05														19.4459	33.8265	24.5259	38.8943	48.0829	43.0939	49.1425	17.3822	-19.1449	12.9554
PDLW2-pigment		18.044	0.000786695	15.6156	0.000790335	38.1717	0.00216127	2.11545	4.97689e-05	0.865417	1.52126e-05														-29.3081	43.5986	-48.2702	50.612	-56.9369	56.6197	-151.39	23.5264	-3.38013	17.5783
PDLW2-pigment		18.0431	0.000698524	15.6145	0.000658869	38.1691	0.00181291	2.11541	4.17655e-05	0.865403	1.29127e-05														-79.4592	38.7142	-114.331	42.1959	-126.68	47.4969	-69.4541	19.7435	-6.45597	14.921
PDLW2-pigment		18.0449	0.000602856	15.6168	0.000614527	38.1748	0.00172527	2.11551	4.25197e-05	0.865442	1.17808e-05														20.4001	33.4086	30.6563	39.3504	22.8988	45.1941	96.983	20.099	0.185418	13.6125
PDLW2-pigment		18.0457	0.000707926	15.6175	0.000693866	38.1781	0.00185105	2.1156	3.77626e-05	0.865441	1.14537e-05														65.2021	39.2295	74.4929	44.4288	109.163	48.4846	-26.3209	17.8496	-3.49893	13.2345
PDLW2-pigment		18.0444	0.000354619	15.6169	0.00035625	38.1754	0.000973081	2.11561	2.20886e-05	0.865473	6.56855e-06														-10.8929	19.6526	35.7404	22.8118	38.1346	25.4898	-110.165	10.4408	-89.9627	7.58954
PDLW2-pigment		18.0452	0.000833915	15.6173	0.000815708	38.176	0.00221049	2.11555	5.13827e-05	0.865458	1.4976e-05														35.8592	46.2126	64.8587	52.2309	55.6255	57.9025	-20.4811	24.2881	-27.6434	17.3042
PDLW2-pigment		18.0434	0.000742616	15.6151	0.000735739	38.1706	0.00214827	2.11546	4.90249e-05	0.86542	1.36558e-05														-66.1771	41.1573	-80.6975	47.1173	-87.8685	56.2809	-122.778	23.1746	-51.9043	15.7794
PDLW2-pigment		18.0438	0.000686536	15.6158	0.00064657	38.1723	0.00175159	2.11551	3.90783e-05	0.865443	1.29752e-05														-44.2693	38.0484	-32.1148	41.4048	-43.2828	45.8866	-76.913	18.4723	-27.8851	14.9925
PDLW2-pigment		18.0448	0.000628291	15.6164	0.000608367	38.1747	0.00163775	2.11553	3.6755e-05	0.865429	1.13365e-05														12.2532	34.8184	7.56164	38.9568	22.0694	42.9014	-154.834	17.3739	-95.0219	13.0993
PDLW2-pigment		18.0456	0.00071399	15.6169	0.00067773	38.1759	0.00182091	2.11549	3.87479e-05	0.865415	1.21814e-05														59.7358	39.5658	39.5616	43.3971	52.2788	47.6979	-242.032	18.3163	-136.783	14.0758
PDLW2-pigment		18.0443	0.00070497	15.616	0.000669081	38.1728	0.0018024	2.11548	3.96043e-05	0.865426	1.18633e-05														-14.3923	39.0688	-22.6642	42.8459	-27.9702	47.2167	-125.292	18.7212	-88.4897	13.7081
PDLW2-pigment		18.0443	0.000690391	15.6162	0.000635976	38.174	0.00181113	2.11554	3.69083e-05	0.86544	1.16904e-05														-13.1985	38.2609	-5.09806	40.7253	3.19101	47.444	66.5516	17.4462	18.6503	13.508
PDLW2-pigment		18.0449	0.000820274	15.6175	0.000785273	38.1768	0.00223606	2.11563	5.08299e-05	0.865481	1.28008e-05														19.5366	45.4574	75.4242	50.2816	76.0594	58.5711	35.834	24.0259	9.17347	14.7904
PDLW2-pigment		18.044	0.000649589	15.6153	0.00065728	38.1702	0.0018831	2.11537	4.56139e-05	0.865405	1.32603e-05														-30.5881	36.0003	-63.0017	42.0919	-97.7001	49.3343	82.6759	21.5631	35.6464	15.3227
PDLW2-pigment		18.0439	0.000738658	15.6155	0.000711066	38.1719	0.00191388	2.11547	3.97223e-05	0.865415	1.17232e-05														-33.6563	40.9366	-54.7362	45.536	-52.833	50.1385	25.7644	18.7771	-25.0577	13.5463
PDLW2-pigment		18.0445	0.000635556	15.6165	0.000611178	38.1749	0.0017646	2.11557	3.90428e-05	0.865444	1.07211e-05														-4.2572	35.2217	8.61129	39.1368	25.2678	46.224	72.8055	18.455	33.9236	12.388
PDLW2-pigment		18.0446	0.000693026	15.6164	0.000671441	38.1739	0.00179912	2.1155	3.95187e-05	0.865437	1.20828e-05														3.44935	38.4062	7.81489	42.9958	0.208531	47.1295	91.0307	18.6805	35.2735	13.9615
PDLW2-pigment		18.045	0.000684021	15.6166	0.000648071	38.1746	0.00170671	2.1155	3.569e-05	0.865428	1.11043e-05														23.1905	37.9065	17.0638	41.4989	17.9131	44.7081	-91.1253	16.8707	-96.2525	12.831
PDLW2-pigment		18.0457	0.000651131	15.6174	0.000641688	38.1773	0.00170168	2.11556	3.63118e-05	0.86544	1.16331e-05														63.596	36.0823	71.2917	41.0879	89.7757	44.5731	-112.083	17.1641	-80.234	13.4418
																		18.4	18.45
																				0.00271003	2710.03

## Sheet: SE + Accuracy (spot)
	Total beam	²⁰⁶Pb/²⁰⁴Pb	SE_²⁰⁶Pb/²⁰⁴Pb	²⁰⁷Pb/²⁰⁴Pb	SE_²⁰⁷Pb/²⁰⁴Pb	²⁰⁸Pb/²⁰⁴Pb	SE_²⁰⁸Pb/²⁰⁴Pb	²⁰⁸Pb/²⁰⁶Pb	SE_²⁰⁸Pb/²⁰⁶Pb	²⁰⁷Pb/²⁰⁶Pb	SE_²⁰⁷Pb/²⁰⁶Pb	Grid-a/spot-b	Grid-1/spot-0	Area (µm2)	speed µm/sec	spot µm	Energy %	Energy (J)	Hz	Integration time	Ablation time sec	N (dosage) overlapping pulse per unit of material	Te total energy per unit area delivered to a point as the beam passes	date	Bias ²⁰⁶Pb/²⁰⁴Pb	SE_²⁰⁶Pb/²⁰⁴Pb ppm	Bias ²⁰⁷Pb/²⁰⁴Pb	SE_²⁰⁷Pb/²⁰⁴Pb ppm	Bias ²⁰⁸Pb/²⁰⁴Pb	SE_²⁰⁸Pb/²⁰⁴Pb ppm	Bias ²⁰⁸Pb/²⁰⁶Pb	SE_²⁰⁸Pb/²⁰⁶Pb ppm	Bias ²⁰⁷Pb/²⁰⁶Pb	SE_²⁰⁷Pb/²⁰⁶Pb ppm
PDLW2-15-115.26	24.51	18.0398	0.0035	15.6126	0.003	38.1572	0.0076	2.11517	0.00021	0.865453	0.00011	b	0	176.715	0	15	5	0.51	2	1	113	226	115.26	2025-07-29	-263.32	194.015	-238.626	192.152	-437.845	199.176	-161.49	99.2829	23.2362	127.101
PDLW2-15-115.26	24.01	18.0405	0.0039	15.6121	0.0033	38.1602	0.0082	2.11525	0.00023	0.865392	0.0001	b	0	176.715	0	15	5	0.51	2	1	113	226	115.26	2025-07-29	-224.508	216.18	-270.661	211.375	-359.195	214.884	-121.668	108.734	-47.593	115.555
PDLW2-15-115.26	26.52	18.0417	0.0054	15.6133	0.0047	38.163	0.011	2.11527	0.00026	0.865401	0.00013	b	0	176.715	0	15	5	0.51	2	1	113	226	115.26	2025-07-29	-157.981	299.307	-193.782	301.025	-285.799	288.237	-114.81	122.916	-37.2468	150.219
PDLW2-15-115.26	24.71	18.0433	0.0053	15.6141	0.0051	38.168	0.012	2.11536	0.00034	0.865368	0.00015	b	0	176.715	0	15	5	0.51	2	1	113	226	115.26	2025-07-29	-69.2913	293.738	-142.537	326.628	-154.762	314.399	-72.4768	160.729	-74.6914	173.337
PDLW2-15-115.26	25.87	18.0458	0.005	15.6183	0.0045	38.177	0.011	2.11556	0.00034	0.865481	0.00016	b	0	176.715	0	15	5	0.51	2	1	113	226	115.26	2025-07-31	69.2547	277.073	126.417	288.124	81.0189	288.132	24.7513	160.714	55.7154	184.868
PDLW2-15-115.26	26.17	18.0425	0.0042	15.6151	0.0042	38.1682	0.0097	2.11546	0.00033	0.865462	0.00017	b	0	176.715	0	15	5	0.51	2	1	113	226	115.26	2025-07-31	-113.634	232.784	-78.4868	268.97	-149.521	254.138	-22.8957	155.994	33.6923	196.427
PDLW2-15-115.26	23.36	18.0415	0.0038	15.6131	0.0036	38.161	0.0088	2.11518	0.00031	0.865399	0.00013	b	0	176.715	0	15	5	0.51	2	1	113	226	115.26	2025-07-31	-169.068	210.626	-206.594	230.576	-338.223	230.602	-156.138	146.56	-38.9711	150.22
PDLW2-15-115.26	24.68	18.0465	0.005	15.6183	0.0043	38.1762	0.0095	2.11544	0.00023	0.865448	0.00012	b	0	176.715	0	15	5	0.51	2	1	113	226	115.26	2025-07-31	108.041	277.062	126.417	275.318	60.0652	248.846	-34.9937	108.725	16.9273	138.657
PDLW2-15-115.26	28.79	18.047	0.0041	15.6178	0.0037	38.1795	0.0084	2.11556	0.00017	0.865396	8.7e-05	b	0	176.715	0	15	5	0.51	2	1	113	226	115.26	2025-08-01	135.743	227.185	94.4064	236.909	146.494	220.013	23.7384	80.357	-42.7935	100.532
PDLW2-15-115.26	27.59	18.0475	0.0041	15.6201	0.0035	38.1796	0.0085	2.11551	0.0002	0.865499	8.7e-05	b	0	176.715	0	15	5	0.51	2	1	113	226	115.26	2025-08-01	163.444	227.178	241.639	224.07	149.113	222.632	-1.34717	94.54	76.7564	100.52
PDLW2-15-115.26	27.37	18.043	0.0041	15.6136	0.0035	38.1678	0.0089	2.11538	0.00018	0.865355	9.4e-05	b	0	176.715	0	15	5	0.51	2	1	113	226	115.26	2025-08-01	-85.9194	227.235	-174.564	224.164	-160.002	233.181	-61.0893	85.0911	-90.0887	108.626
PDLW2-15-115.26	27.35	18.0463	0.0038	15.6177	0.0032	38.1784	0.0079	2.11558	0.00017	0.865424	7.9e-05	b	0	176.715	0	15	5	0.51	2	1	113	226	115.26	2025-08-01	96.9593	210.569	88.004	204.896	117.686	206.923	33.7148	80.3562	-10.4072	91.2847
PDLW2-15-115.26	27.08	18.0462	0.0042	15.6164	0.0036	38.1741	0.0089	2.11535	0.0002	0.865357	9.5e-05	b	0	176.715	0	15	5	0.51	2	1	113	226	115.26	2025-08-01	91.4185	232.736	4.76553	230.527	5.05735	233.142	-73.3815	94.5468	-88.1121	109.781
PDLW2-15-115.26	26.66	18.045	0.0039	15.6164	0.0038	38.1762	0.0086	2.11561	0.00024	0.865414	0.00012	b	0	176.715	0	15	5	0.51	2	1	113	226	115.26	2025-08-01	24.9242	216.126	4.76553	243.334	60.0652	225.271	48.1279	113.442	-21.6103	138.662
PDLW2-15-115.26	26.67	18.0417	0.0044	15.6133	0.0042	38.166	0.01	2.11543	0.00029	0.865401	0.00014	b	0	176.715	0	15	5	0.51	2	1	113	226	115.26	2025-08-01	-157.981	243.879	-193.782	269.001	-207.172	262.013	-36.1966	137.088	-37.2468	161.775
PDLW2-15-115.26	14.59	18.044	0.0078	15.6145	0.0068	38.164	0.015	2.11505	0.00053	0.865357	0.00029	b	0	176.715	0	15	5	0.51	2	1	113	226	115.26	2025-08-04	-30.4945	432.277	-116.916	435.493	-259.589	393.041	-216.098	250.585	-87.8697	335.122
PDLW2-15-115.26	15.02	18.0399	0.0067	15.6135	0.0056	38.164	0.014	2.11553	0.00043	0.865498	0.00021	b	0	176.715	0	15	5	0.51	2	1	113	226	115.26	2025-08-04	-257.775	371.399	-180.97	358.664	-259.589	366.838	11.1738	203.258	75.3344	242.635
PDLW2-15-115.26	14.44	18.0344	0.0081	15.6096	0.0072	38.159	0.017	2.1159	0.00052	0.865546	0.00025	b	0	176.715	0	15	5	0.51	2	1	113	226	115.26	2025-08-04	-562.827	449.142	-430.862	461.255	-390.653	445.504	185.061	245.758	130.44	288.835
PDLW2-15-115.26	14.61	18.0438	0.0059	15.6162	0.0063	38.172	0.014	2.11552	0.00045	0.865461	0.00025	b	0	176.715	0	15	5	0.51	2	1	113	226	115.26	2025-08-04	-41.579	326.982	-8.04162	403.427	-49.9565	366.761	4.60939	212.714	32.085	288.863
PDLW2-10-475.08	29.31	18.0444	0.0029	15.6163	0.0026	38.1756	0.006	2.11565	0.00019	0.865437	9.3e-05	b	0	78.5398	0	10	20	2.14	2	1	111	222	475.08	2025-07-29	-8.32629	160.715	-1.638	166.493	44.3493	157.168	65.6609	89.807	5.23718	107.46
PDLW2-10-475.08	29.69	18.0423	0.003	15.6162	0.0026	38.171	0.0058	2.11564	0.00023	0.865533	0.00011	b	0	78.5398	0	10	20	2.14	2	1	111	222	475.08	2025-07-29	-124.72	166.276	-8.04162	166.494	-76.1557	151.948	61.5445	108.714	115.213	127.089
PDLW2-10-475.08	28.53	18.0433	0.0036	15.6169	0.0029	38.1765	0.0068	2.11583	0.00024	0.865523	0.00012	b	0	78.5398	0	10	20	2.14	2	1	111	222	475.08	2025-07-29	-69.2913	199.52	36.782	185.696	67.9229	178.12	150.189	113.431	104.615	138.644
PDLW2-10-475.08	28.57	18.0475	0.0029	15.6178	0.0029	38.1808	0.0069	2.11557	0.0002	0.865372	9.4e-05	b	0	78.5398	0	10	20	2.14	2	1	111	222	475.08	2025-07-29	163.444	160.687	94.4064	185.686	180.537	180.719	30.0823	94.537	-70.5001	108.624
PDLW2-10-475.08	31.1	18.0466	0.0042	15.6157	0.0038	38.1755	0.0079	2.11538	0.00022	0.865299	0.00011	b	0	78.5398	0	10	20	2.14	2	1	111	222	475.08	2025-07-31	113.581	232.731	-40.0609	243.345	41.7299	206.939	-58.8722	104	-155.111	127.124
PDLW2-10-475.08	28.3	18.0416	0.0042	15.6118	0.0039	38.1641	0.0093	2.11534	0.00023	0.865322	0.00011	b	0	78.5398	0	10	20	2.14	2	1	111	222	475.08	2025-07-31	-163.524	232.795	-289.882	249.811	-256.968	243.685	-80.4403	108.73	-127.788	127.12
PDLW2-10-475.08	26.97	18.0419	0.0048	15.6139	0.004	38.1682	0.0096	2.11553	0.00022	0.865424	0.0001	b	0	78.5398	0	10	20	2.14	2	1	111	222	475.08	2025-07-31	-146.894	266.047	-155.347	256.182	-149.521	251.518	10.3599	103.993	-9.9035	115.55
PDLW2-10-475.08	28.97	18.0426	0.005	15.6146	0.0045	38.173	0.01	2.11572	0.00031	0.86543	0.00016	b	0	78.5398	0	10	20	2.14	2	1	111	222	475.08	2025-07-31	-108.091	277.122	-110.511	288.192	-23.7587	261.965	97.3086	146.523	-3.87044	184.879
PDLW2-10-475.08	14.08	18.0407	0.0079	15.6124	0.0071	38.166	0.016	2.11555	0.00052	0.865399	0.00024	b	0	78.5398	0	10	20	2.14	2	1	111	222	475.08	2025-08-04	-213.42	437.899	-251.44	454.767	-207.172	419.221	19.2325	245.799	-39.463	277.329
PDLW2-10-475.08	11.58	18.0437	0.0072	15.6145	0.0064	38.161	0.015	2.11492	0.00051	0.865371	0.00025	b	0	78.5398	0	10	20	2.14	2	1	111	222	475.08	2025-08-04	-47.1213	399.031	-116.916	409.875	-338.223	393.071	-278.098	241.144	-71.2422	288.893
PDLW2-10-475.08	14.81	18.043	0.013	15.616	0.011	38.182	0.024	2.11617	0.00083	0.865488	0.00048	b	0	78.5398	0	10	20	2.14	2	1	111	222	475.08	2025-08-04	-85.9194	720.501	-20.8491	704.406	211.96	628.568	310.836	392.219	63.6137	554.6
PDLW2-10-475.08	10.51	18.0392	0.007	15.6105	0.0058	38.156	0.015	2.11517	0.00052	0.865365	0.00021	b	0	78.5398	0	10	20	2.14	2	1	111	222	475.08	2025-08-04	-296.59	388.044	-373.183	371.545	-469.309	393.123	-159.679	245.843	-78.0221	242.672
PDLW2-10-475.08	28.15	18.0408	0.0043	15.6111	0.0036	38.1645	0.0087	2.11545	0.00022	0.865322	9.4e-05	b	0	78.5398	0	10	20	2.14	2	1	111	222	475.08	2025-08-05	-207.876	238.349	-334.735	230.605	-246.484	227.961	-25.6134	103.997	-128.284	108.63
PDLW2-10-475.08	24.86	18.0379	0.0045	15.6074	0.0041	38.1415	0.0098	2.11452	0.00025	0.865256	0.00013	b	0	78.5398	0	10	20	2.14	2	1	111	222	475.08	2025-08-05	-368.682	249.475	-571.881	262.696	-849.65	256.938	-467.799	118.23	-204.576	150.245
PDLW2-10-475.08	28.85	18.0392	0.0044	15.6116	0.0041	38.1573	0.0098	2.11524	0.00025	0.865426	0.00012	b	0	78.5398	0	10	20	2.14	2	1	111	222	475.08	2025-08-05	-296.59	243.913	-302.697	262.625	-435.223	256.832	-125.604	118.19	-7.55614	138.66
PDLW2-10-475.08	29.36	18.0342	0.0045	15.6085	0.0041	38.1461	0.0086	2.11521	0.00029	0.865494	0.00014	b	0	78.5398	0	10	20	2.14	2	1	111	222	475.08	2025-08-05	-573.923	249.526	-501.367	262.677	-728.959	225.449	-141.958	137.102	71.0639	161.757
PDLW2-10-475.08	24.76	18.0406	0.0041	15.6117	0.0039	38.1602	0.0094	2.11524	0.00029	0.865365	0.00015	b	0	78.5398	0	10	20	2.14	2	1	111	222	475.08	2025-08-05	-218.964	227.265	-296.289	249.813	-359.195	246.33	-127.212	137.1	-78.7595	173.337
PDLW2-10-475.08	26.79	18.0396	0.0039	15.6118	0.0037	38.1646	0.0086	2.1156	0.00028	0.865418	0.00013	b	0	78.5398	0	10	20	2.14	2	1	111	222	475.08	2025-08-05	-274.41	216.191	-289.882	237	-243.863	225.34	43.5243	132.35	-16.919	150.216
PDLW2-10-475.08	24.9	18.038	0.0048	15.6115	0.0045	38.157	0.011	2.11537	0.00031	0.865478	0.00013	b	0	78.5398	0	10	20	2.14	2	1	111	222	475.08	2025-08-05	-363.136	266.105	-309.104	288.249	-443.089	288.283	-66.9365	146.547	52.561	150.206
PDLW2-10-475.08	27.97	18.0372	0.0044	15.608	0.004	38.1495	0.0096	2.11505	0.00028	0.865323	0.00013	b	0	78.5398	0	10	20	2.14	2	1	111	222	475.08	2025-08-05	-407.505	243.94	-533.417	256.279	-639.771	251.642	-219.182	132.385	-127.313	150.233
PDLW2-10-712.62	47.32	18.0464	0.0035	15.6182	0.0032	38.176	0.0076	2.11544	0.00017	0.865447	9.9e-05	b	0	78.5398	0	10	20	2.14	3	1	111	333	712.62	2025-08-01	102.5	193.944	120.015	204.889	54.8266	199.078	-34.6913	80.3617	16.0658	114.392
PDLW2-10-712.62	49.6	18.0505	0.004	15.6218	0.003	38.1929	0.0074	2.11589	0.00023	0.86545	0.00012	b	0	78.5398	0	10	20	2.14	3	1	111	333	712.62	2025-08-01	329.617	221.601	350.435	192.039	497.293	193.753	180.715	108.701	19.3732	138.656
PDLW2-10-712.62	46.5	18.0423	0.0036	15.613	0.003	38.1669	0.0072	2.11541	0.00021	0.865355	0.0001	b	0	78.5398	0	10	20	2.14	3	1	111	333	712.62	2025-08-01	-124.72	199.531	-213.001	192.148	-183.587	188.645	-45.8719	99.2714	-89.7205	115.559
PDLW2-10-712.62	43.66	18.0377	0.0034	15.6101	0.003	38.1587	0.0077	2.1155	0.00016	0.865415	8e-05	b	0	78.5398	0	10	20	2.14	3	1	111	333	712.62	2025-08-01	-379.774	188.494	-398.817	192.183	-398.518	201.789	-5.75084	75.6323	-20.4876	92.4412
PDLW2-14.7	14.21	18.0467	0.0017	15.6185	0.0015	38.1805	0.0036	2.11565	9.2e-05	0.865449	4.8e-05	a	1	225	1	5	1	0.42	7	0.5	52	35	14.7	2026-11-06	119.122	94.2	139.221	96.04	172.681	94.289	66.5516	43.4855	18.6503	55.4625
PDLW2-14.7	14.33	18.0456	0.0019	15.6174	0.0016	38.177	0.0037	2.11558	9.8e-05	0.865441	4.7e-05	a	1	225	1	5	1	0.42	7	0.5	52	35	14.7	2026-11-06	58.1725	105.289	68.7964	102.45	81.0189	96.917	35.834	46.3229	9.17347	54.3076
PDLW2-14.7	14.04	18.0457	0.0018	15.6179	0.0015	38.179	0.0037	2.11568	0.0001	0.865464	5e-05	a	1	225	1	5	1	0.42	7	0.5	52	35	14.7	2026-11-06	63.7136	99.7468	100.809	96.0436	133.4	96.9119	82.6759	47.266	35.6464	57.7725
PDLW2-14.7	13.77	18.0446	0.0018	15.616	0.0015	38.1745	0.0036	2.11556	8.8e-05	0.865411	4.5e-05	a	1	225	1	5	1	0.42	7	0.5	52	35	14.7	2026-11-06	2.75745	99.7528	-20.8491	96.0553	15.5355	94.3038	25.7644	41.5965	-25.0577	51.9984
PDLW2-14.7	13.62	18.0455	0.0019	15.6177	0.0016	38.1782	0.0039	2.11566	9.5e-05	0.865462	4.9e-05	a	1	225	1	5	1	0.42	7	0.5	52	35	14.7	2026-11-06	52.6312	105.289	88.004	102.448	112.448	102.153	72.8055	44.9032	33.9236	56.6171
PDLW2-14.7	13.8	18.0464	0.0018	15.6185	0.0015	38.1808	0.0035	2.1157	8.7e-05	0.865463	4.4e-05	a	1	225	1	5	1	0.42	7	0.5	52	35	14.7	2026-11-06	102.5	99.7429	139.221	96.04	180.537	91.6691	91.0307	41.1211	35.2735	50.8398
PDLW2-14.7	8.64	18.046	0.0024	15.617	0.0023	38.1737	0.0055	2.11536	9.9e-05	0.8654	4.4e-05	a	1	225	1	5	1	0.42	7	0.5	49	35	14.7	2026-01-14	80.3368	132.993	43.185	147.275	-5.42102	144.078	-72.7771	46.8007	-38.6058	50.8436
PDLW2-14.7	8.87	18.0429	0.0024	15.6146	0.0021	38.1682	0.0052	2.11541	0.0001	0.865415	4.5e-05	a	1	225	1	5	1	0.42	7	0.5	49	35	14.7	2026-01-14	-91.4622	133.016	-110.511	134.49	-149.521	136.239	-45.0661	47.2721	-20.4978	51.9982
PDLW2-14.7	8.78	18.0428	0.0025	15.614	0.0021	38.1684	0.0049	2.11544	9.9e-05	0.865387	4.9e-05	a	1	225	1	5	1	0.42	7	0.5	49	35	14.7	2026-01-14	-97.0051	138.559	-148.942	134.495	-144.28	128.378	-34.2834	46.7988	-53.383	56.6221
PDLW2-14.7	8.86	18.0432	0.0026	15.6137	0.0022	38.1666	0.0055	2.11529	9.7e-05	0.865351	4.7e-05	a	1	225	1	5	1	0.42	7	0.5	49	35	14.7	2026-01-14	-74.8339	144.099	-168.159	140.902	-191.449	144.105	-103.618	45.8566	-94.769	54.3132
PDLW2-14.7	11.79	18.0441	0.0022	15.6146	0.002	38.1687	0.0047	2.1153	0.00014	0.865358	7e-05	a	1	225	1	5	1	0.42	7	0.5	49	35	14.7	2026-01-15	-24.9524	121.924	-110.511	128.085	-136.419	123.138	-98.4761	66.1844	-87.0073	80.8914
PDLW2-14.7	13.6	18.0449	0.002	15.6161	0.0018	38.1732	0.0042	2.11546	0.00011	0.865402	6.1e-05	a	1	225	1	5	1	0.42	7	0.5	49	35	14.7	2026-01-15	19.3826	110.835	-14.4453	115.266	-18.5193	110.025	-24.9157	51.9982	-35.2797	70.4874
PDLW2-14.7	13.45	18.0427	0.0021	15.6145	0.0017	38.1695	0.0039	2.11551	0.00013	0.865419	6.5e-05	a	1	225	1	5	1	0.42	7	0.5	49	35	14.7	2026-01-15	-102.548	116.391	-116.916	108.873	-115.457	102.176	0.0788475	61.4509	-15.8173	75.1081
PDLW2-14.7	13.53	18.0441	0.002	15.6158	0.0017	38.1718	0.0042	2.11547	0.00013	0.865424	6.1e-05	a	1	225	1	5	1	0.42	7	0.5	49	35	14.7	2026-01-15	-24.9524	110.84	-33.6569	108.864	-55.1963	110.029	-17.2563	61.452	-10.1554	70.4857
PDLW2-14.7	13.25	18.0458	0.0019	15.6171	0.0016	38.1748	0.004	2.11544	0.00014	0.865415	7.4e-05	a	1	225	1	5	1	0.42	7	0.5	46	35	14.7	2026-01-20	69.2547	105.288	49.588	102.452	23.394	104.781	-32.8769	66.1801	-21.1192	85.5081
PDLW2-14.7	13.09	18.0462	0.0023	15.6174	0.0022	38.1771	0.0051	2.11552	0.00016	0.865412	8e-05	a	1	225	1	5	1	0.42	7	0.5	46	35	14.7	2026-01-20	91.4185	127.451	68.7964	140.869	83.6381	133.588	5.20541	75.6315	-24.0753	92.4415
PDLW2-14.7	13.32	18.0421	0.0022	15.6154	0.0021	38.1731	0.0049	2.11578	0.00021	0.865498	0.0001	a	1	225	1	5	1	0.42	7	0.5	46	35	14.7	2026-01-20	-135.807	121.937	-59.2735	134.483	-21.139	128.363	127.637	99.2542	75.0721	115.54
PDLW2-14.7	11.43	18.0447	0.0022	15.6155	0.0018	38.1684	0.0045	2.11521	0.00016	0.865379	7.4e-05	a	1	225	1	5	1	0.42	7	0.5	46	35	14.7	2026-01-20	8.29923	121.919	-52.8692	115.27	-144.28	117.899	-139.592	75.6425	-62.6201	85.5117
PDLW2-14.7	14.78	18.0464	0.002	15.6179	0.0021	38.1788	0.0049	2.11559	0.00014	0.86543	7.1e-05	a	1	225	1	5	1	0.42	7	0.5	47	35	14.7	2026-01-21	102.5	110.825	100.809	134.461	128.162	128.343	38.6504	66.1754	-3.14258	82.0401
PDLW2-14.7	13.95	18.0469	0.002	15.6178	0.0017	38.1788	0.0043	2.11553	0.00012	0.865401	6.2e-05	a	1	225	1	5	1	0.42	7	0.5	47	35	14.7	2026-01-21	130.203	110.822	94.4064	108.85	128.162	112.628	10.9451	56.7233	-37.2522	71.6431
PDLW2-14.7	12.75	18.0452	0.0022	15.6168	0.0018	38.1756	0.0044	2.11555	0.00013	0.865427	6.4e-05	a	1	225	1	5	1	0.42	7	0.5	47	35	14.7	2026-01-21	36.0072	121.916	30.3789	115.26	44.3493	115.257	21.3287	61.4496	-7.07962	73.9519
PDLW2-14.7	11.05	18.0452	0.0021	15.6169	0.002	38.1763	0.0047	2.11559	0.00011	0.865432	5.6e-05	a	1	225	1	5	1	0.42	7	0.5	47	35	14.7	2026-01-21	36.0072	116.374	36.782	128.066	62.6844	123.113	39.6643	51.9949	-0.676256	64.7075
PDLW2-14.7	10.96	18.044	0.0023	15.6157	0.002	38.1729	0.0049	2.11555	0.00014	0.865423	6.7e-05	a	1	225	1	5	1	0.42	7	0.5	47	35	14.7	2026-01-27	-30.4945	127.466	-40.0609	128.076	-26.3784	128.363	17.1024	66.1768	-11.0172	77.4188
PDLW2-14.7	12.05	18.0455	0.0022	15.616	0.0019	38.1759	0.0044	2.11554	0.00015	0.865368	7.9e-05	a	1	225	1	5	1	0.42	7	0.5	47	35	14.7	2026-01-27	52.6312	121.914	-20.8491	121.67	52.2073	115.256	12.5625	70.904	-74.9354	91.2906
PDLW2-14.7	12.27	18.0454	0.0019	15.6168	0.0018	38.1775	0.004	2.11564	0.00015	0.865417	6.9e-05	a	1	225	1	5	1	0.42	7	0.5	47	35	14.7	2026-01-27	47.09	105.29	30.3789	115.26	94.1146	104.774	60.0127	70.9007	-18.163	79.7303
PDLW2-14.7	12.4	18.0486	0.0024	15.6201	0.0019	38.1867	0.0045	2.11577	0.00018	0.865447	8.8e-05	a	1	225	1	5	1	0.42	7	0.5	47	35	14.7	2026-01-27	224.381	132.974	241.639	121.638	335.013	117.842	123.643	85.0754	15.8108	101.682
PDLW2-14.7	8.37	18.0445	0.0032	15.6155	0.0026	38.1712	0.0064	2.11539	0.00015	0.865388	8.2e-05	a	1	225	1	5	1	0.42	7	0.5	46	35	14.7	2026-02-05	-2.78439	177.339	-52.8692	166.501	-70.9158	167.666	-55.1438	70.9088	-51.5358	94.7551
PDLW2-14.7	6.7	18.0436	0.0031	15.6146	0.0028	38.1699	0.0063	2.11543	0.00018	0.865382	9.6e-05	a	1	225	1	5	1	0.42	7	0.5	46	35	14.7	2026-02-05	-52.6637	171.806	-110.511	179.319	-104.976	165.052	-39.3228	85.0892	-59.295	110.934
